# Supplementary material
Source: ML conference proceedings conference paper supplement (https://openreview.net/forum?id=Jx7LBaXM3M)

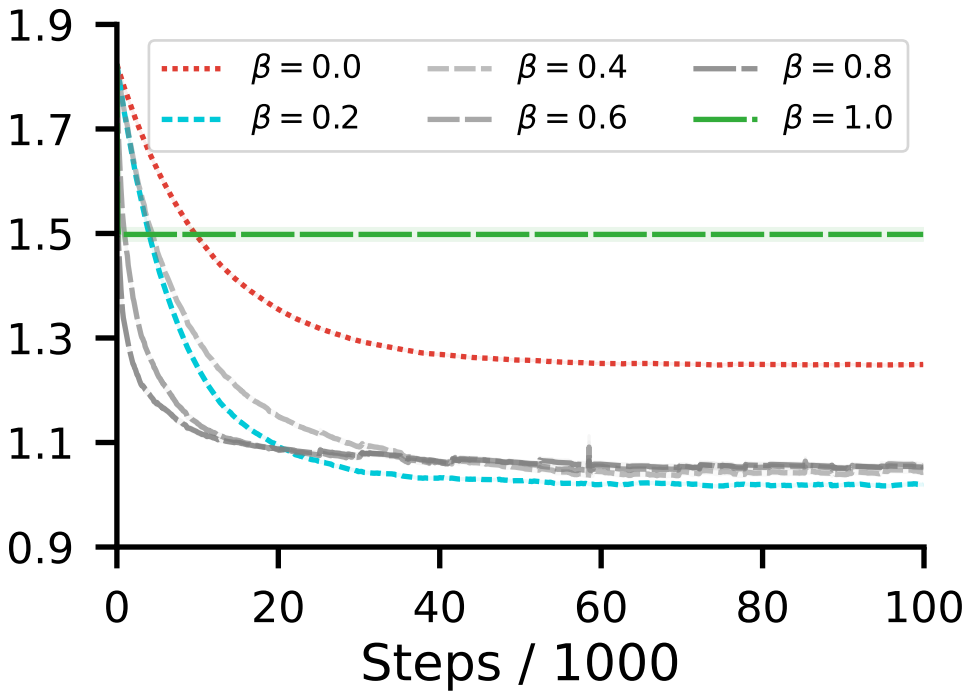

Supplement: supplementary_material [file attachment]

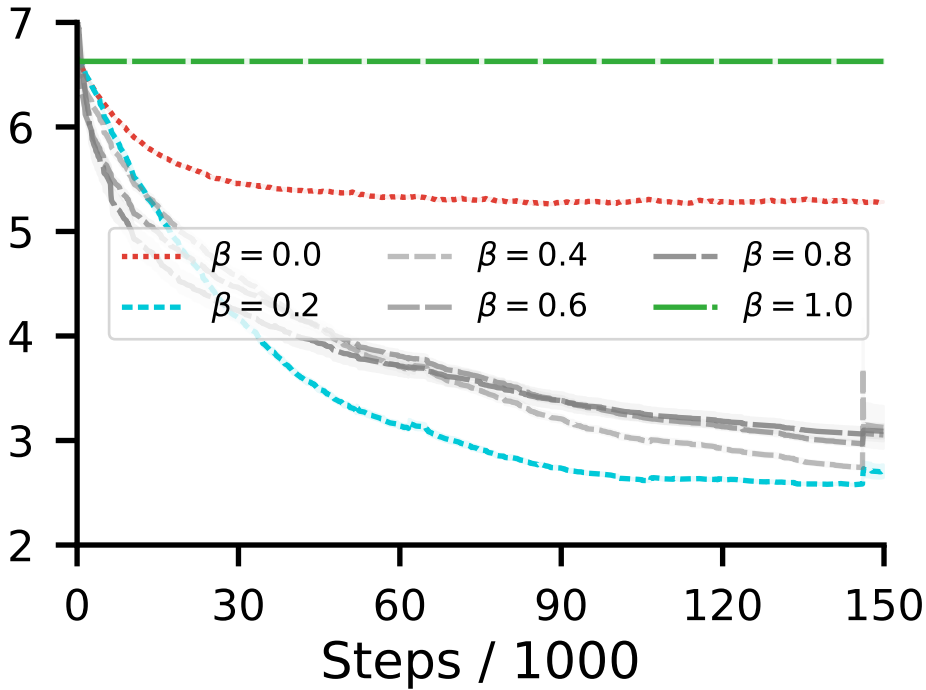

Supplement: supplementary_material [file attachment]

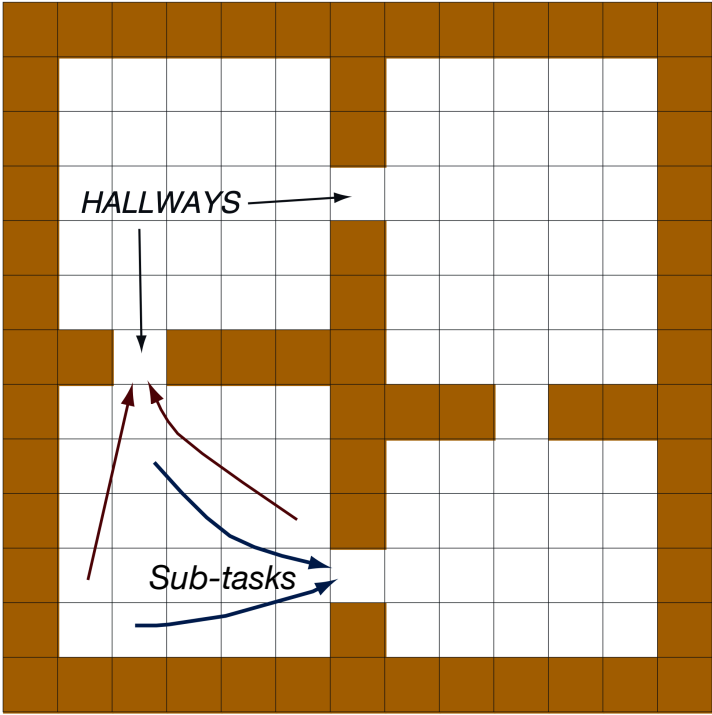

*Four actions:*

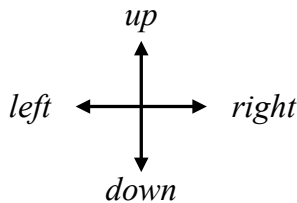

*Four sub-tasks  
(to each hallway)*

Supplement: supplementary_material [file attachment]

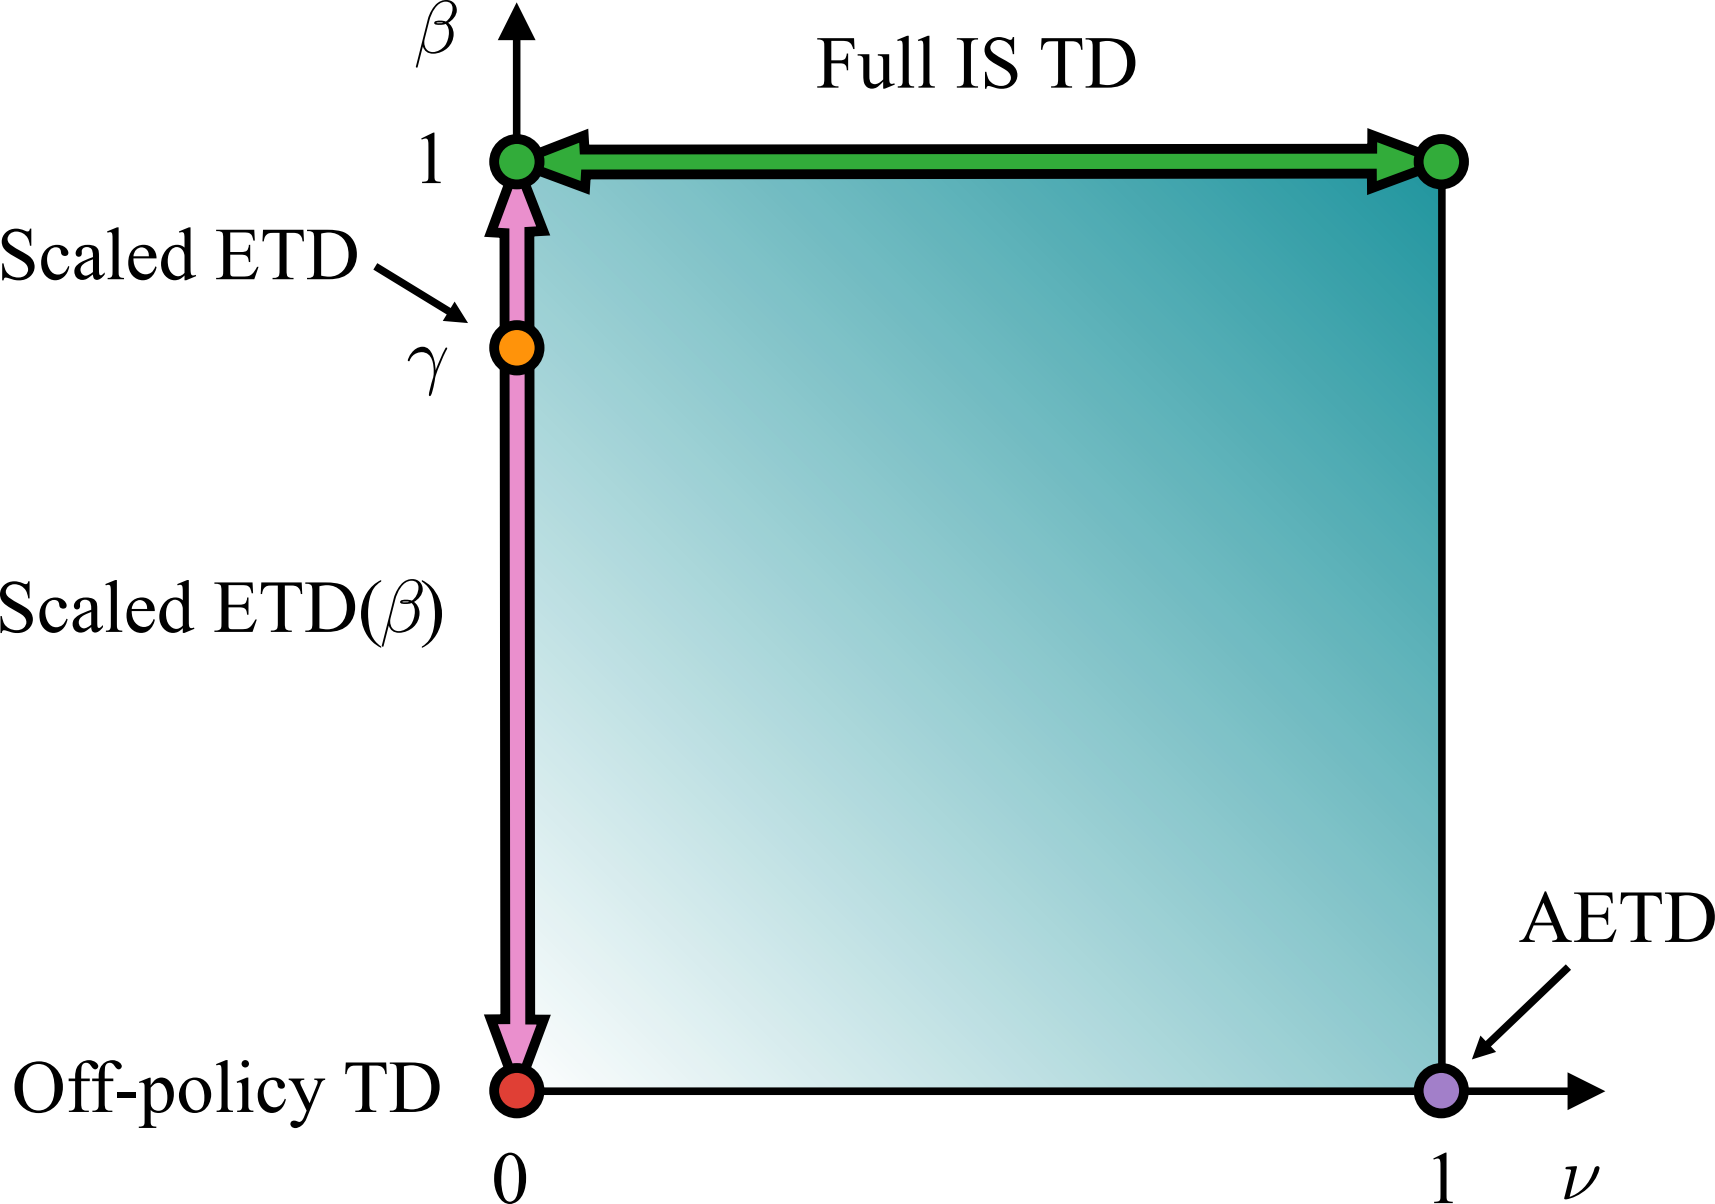

Supplement: supplementary_material [file attachment]

LC-ETD1( $\beta$ )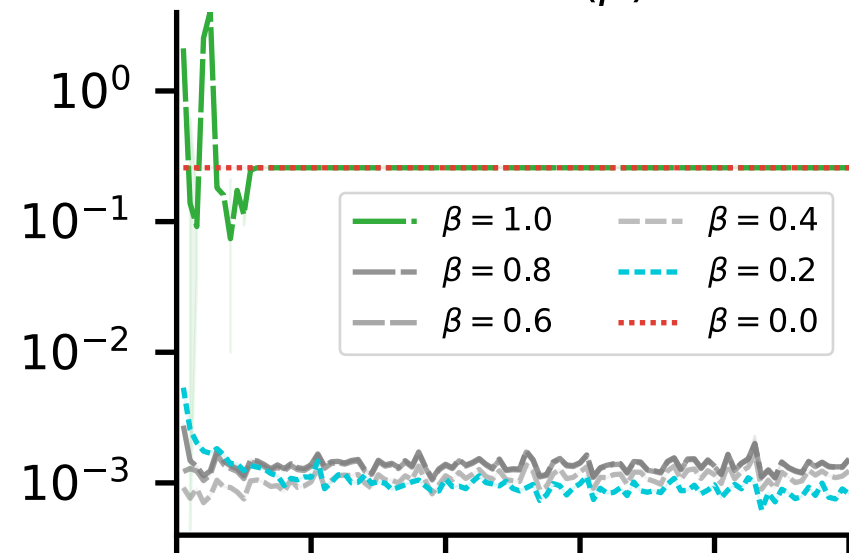LC-ETD2( $\nu$ )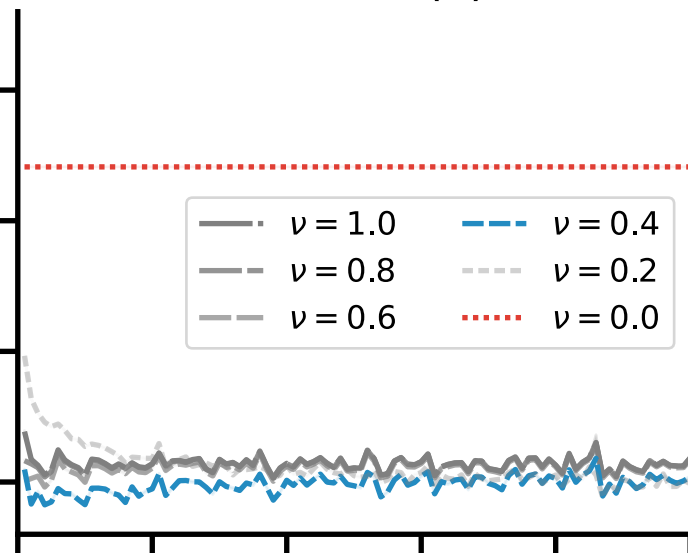LC-ETD3( $\beta$ )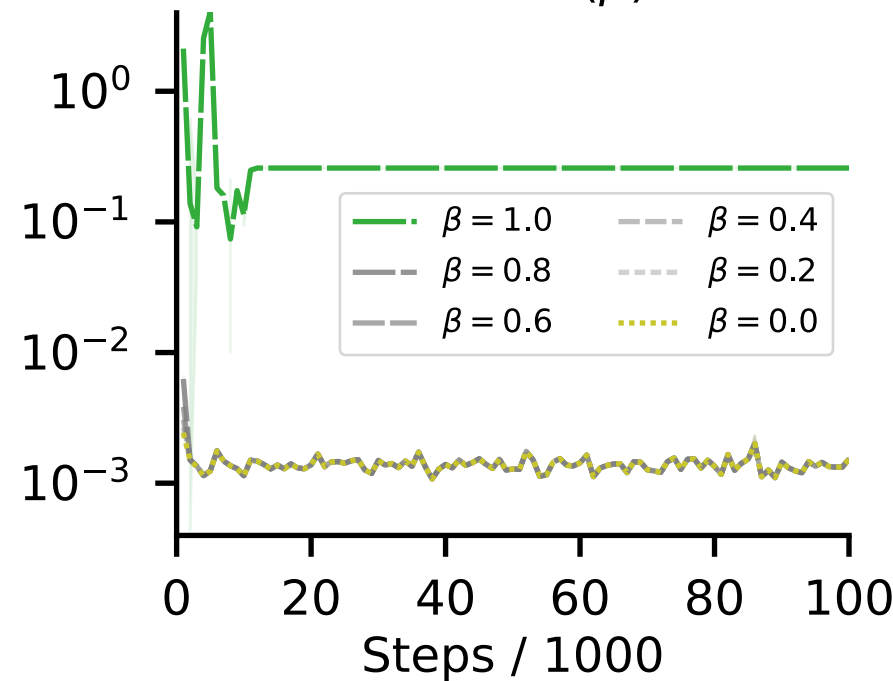ETD( $\beta$ )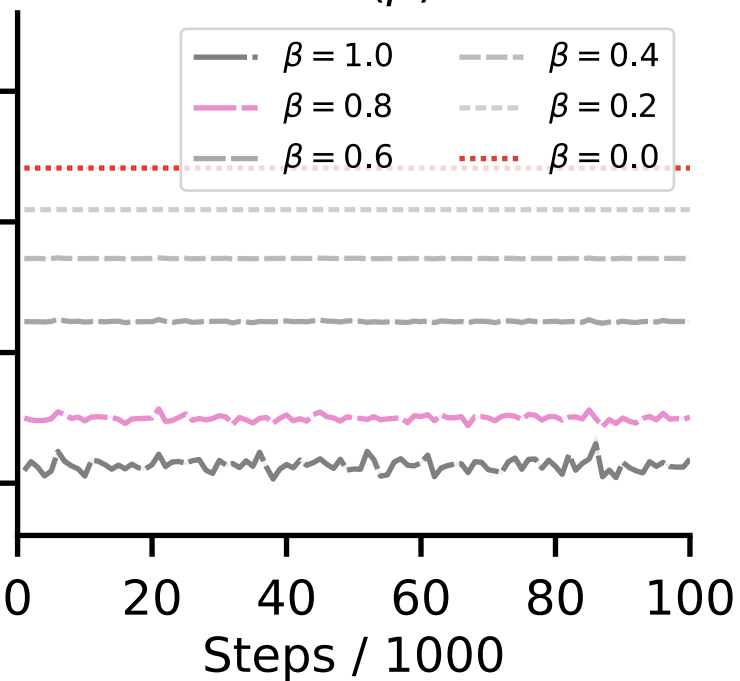

Supplement: supplementary_material [file attachment]

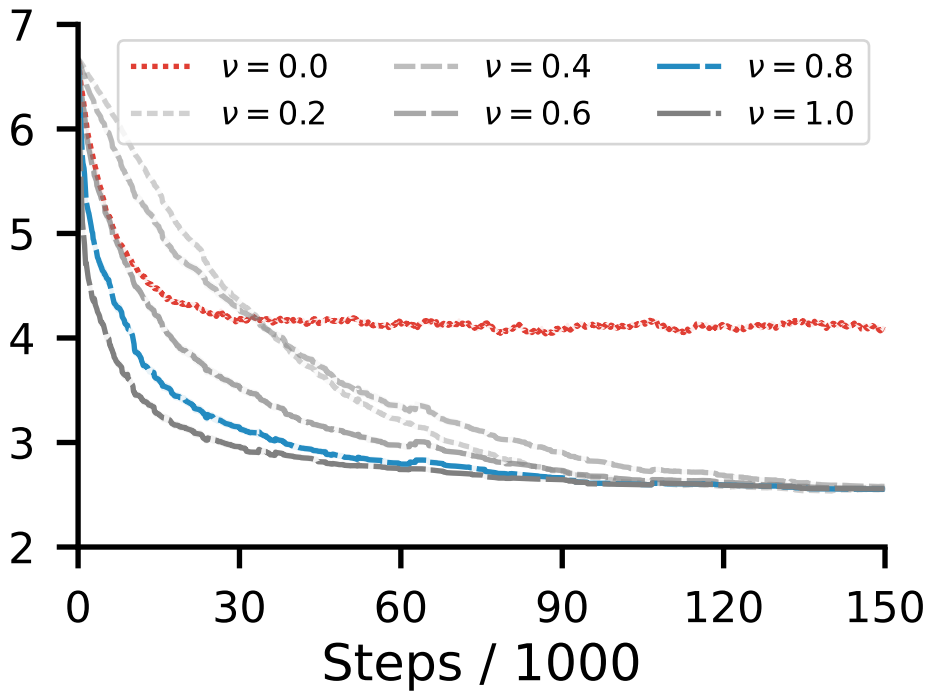

Supplement: supplementary_material [file attachment]

# LC-ETD2( $\nu$ )

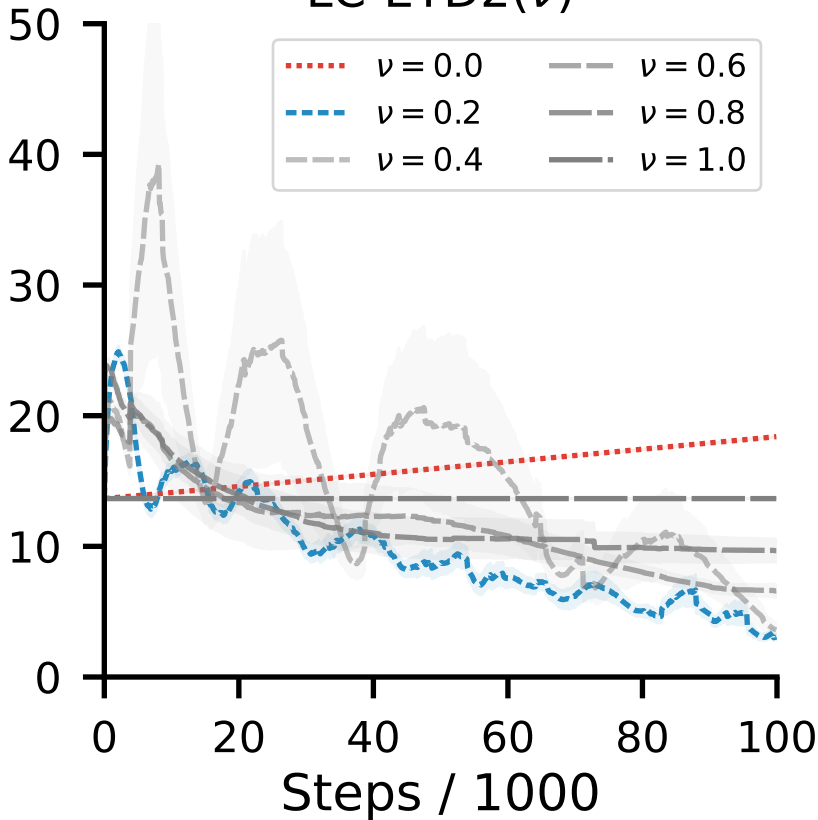

Supplement: supplementary_material [file attachment]

# Two-state

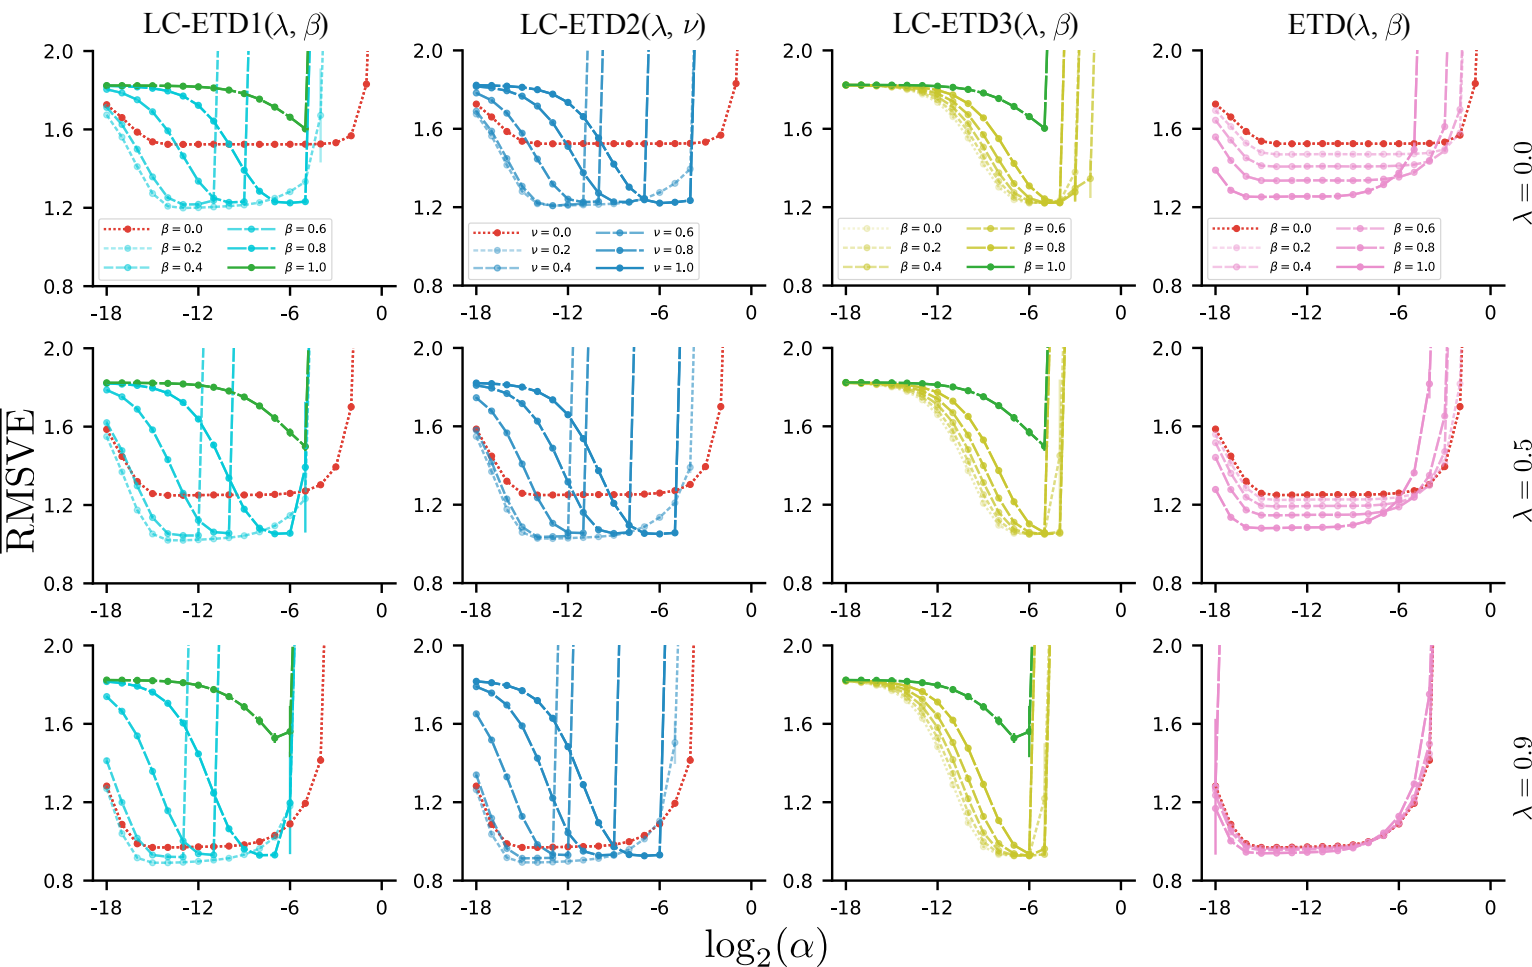

Supplement: supplementary_material [file attachment]

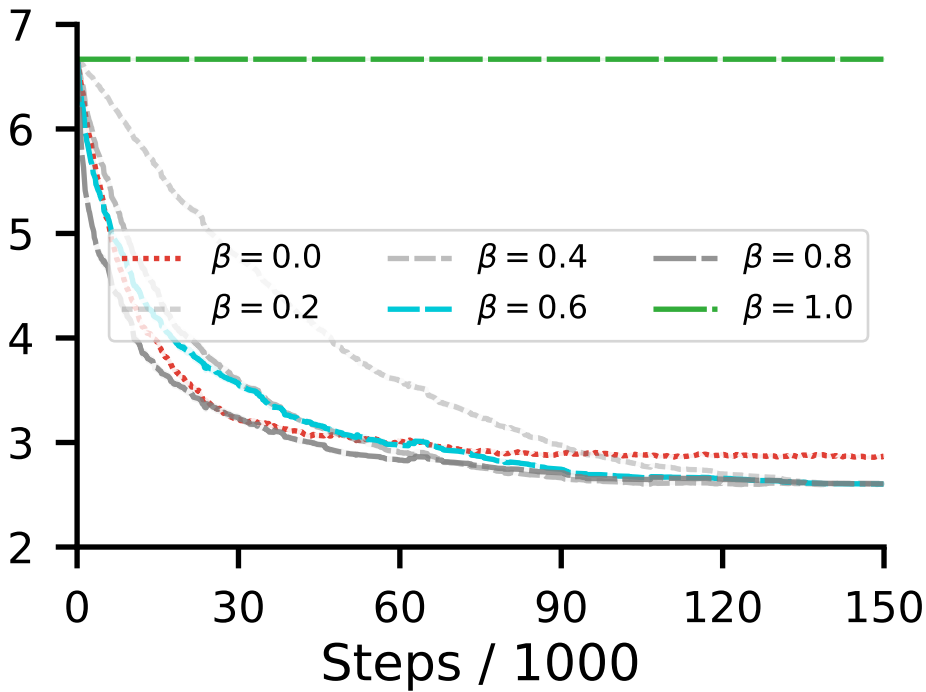

Supplement: supplementary_material [file attachment]

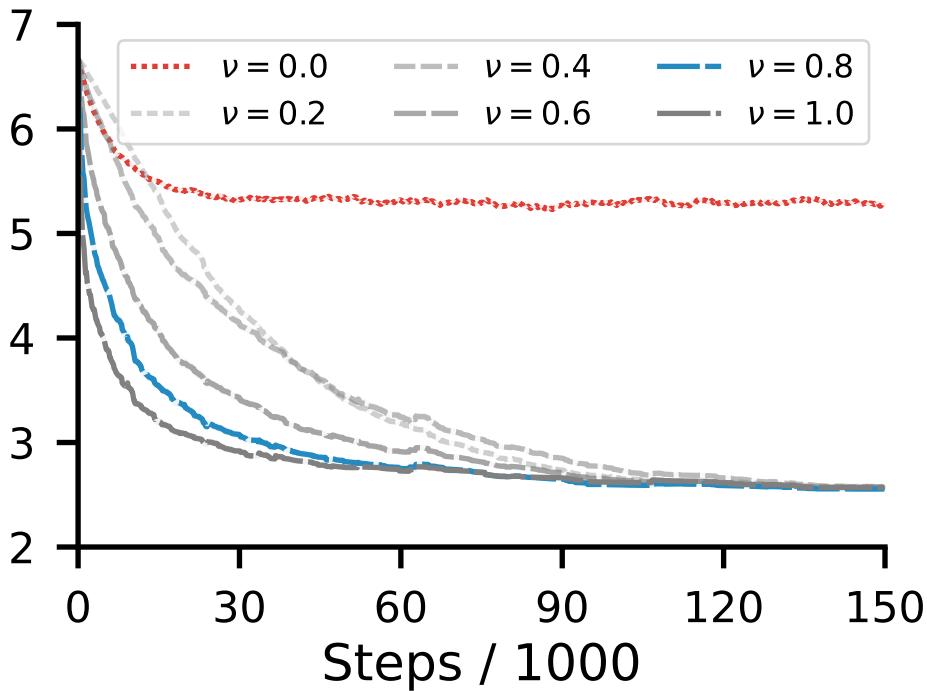

Supplement: supplementary_material [file attachment]

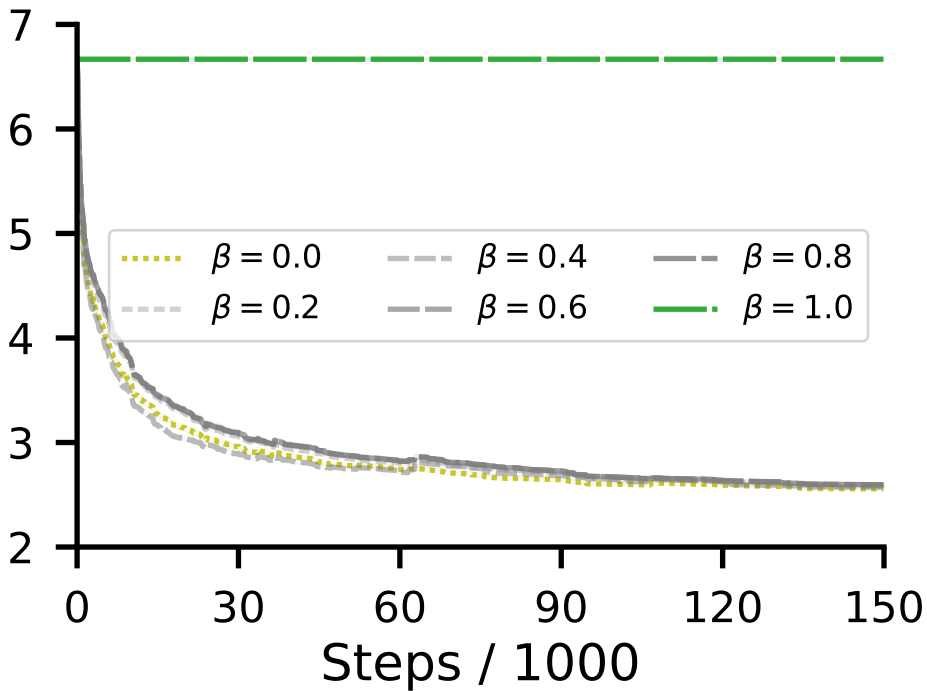

Supplement: supplementary_material [file attachment]

# Variances of state emphasis

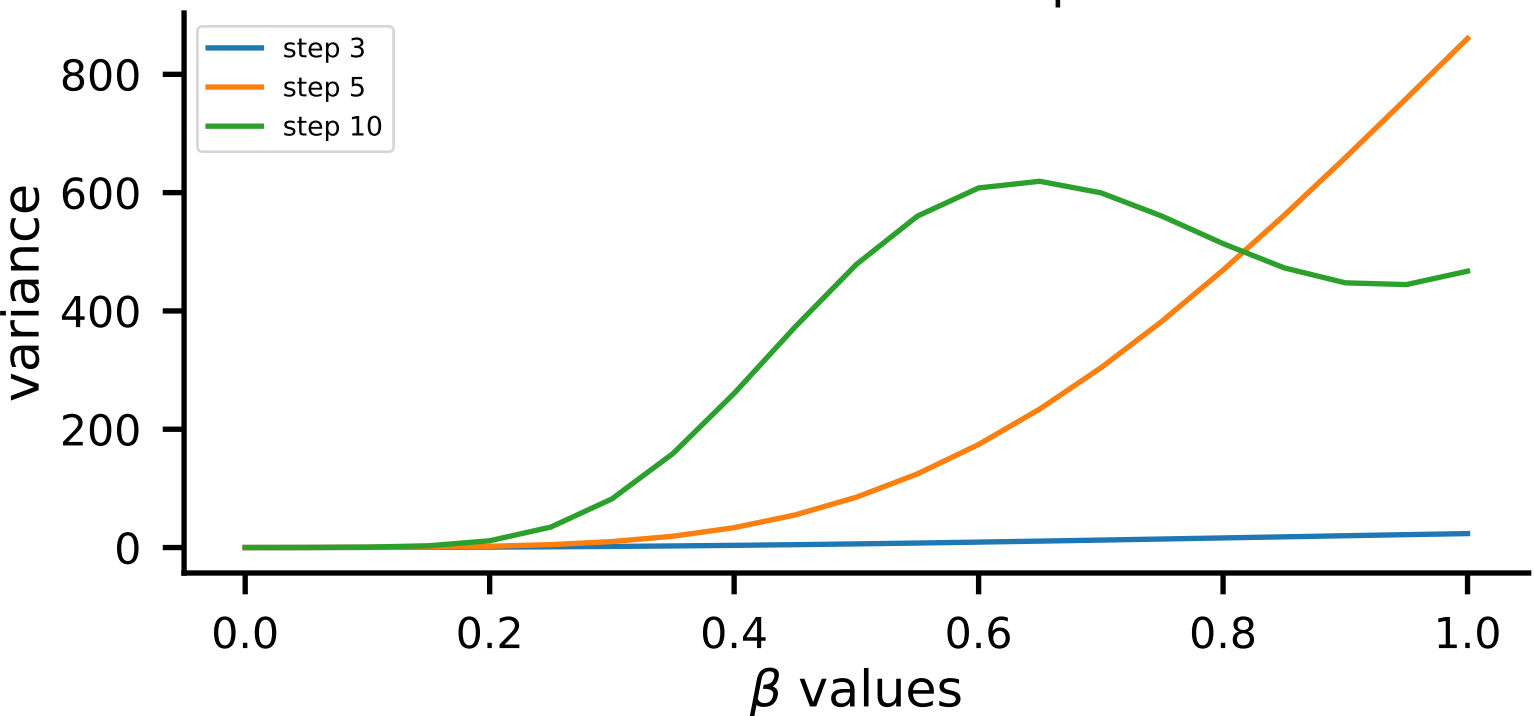

# Squared bias of state emphasis

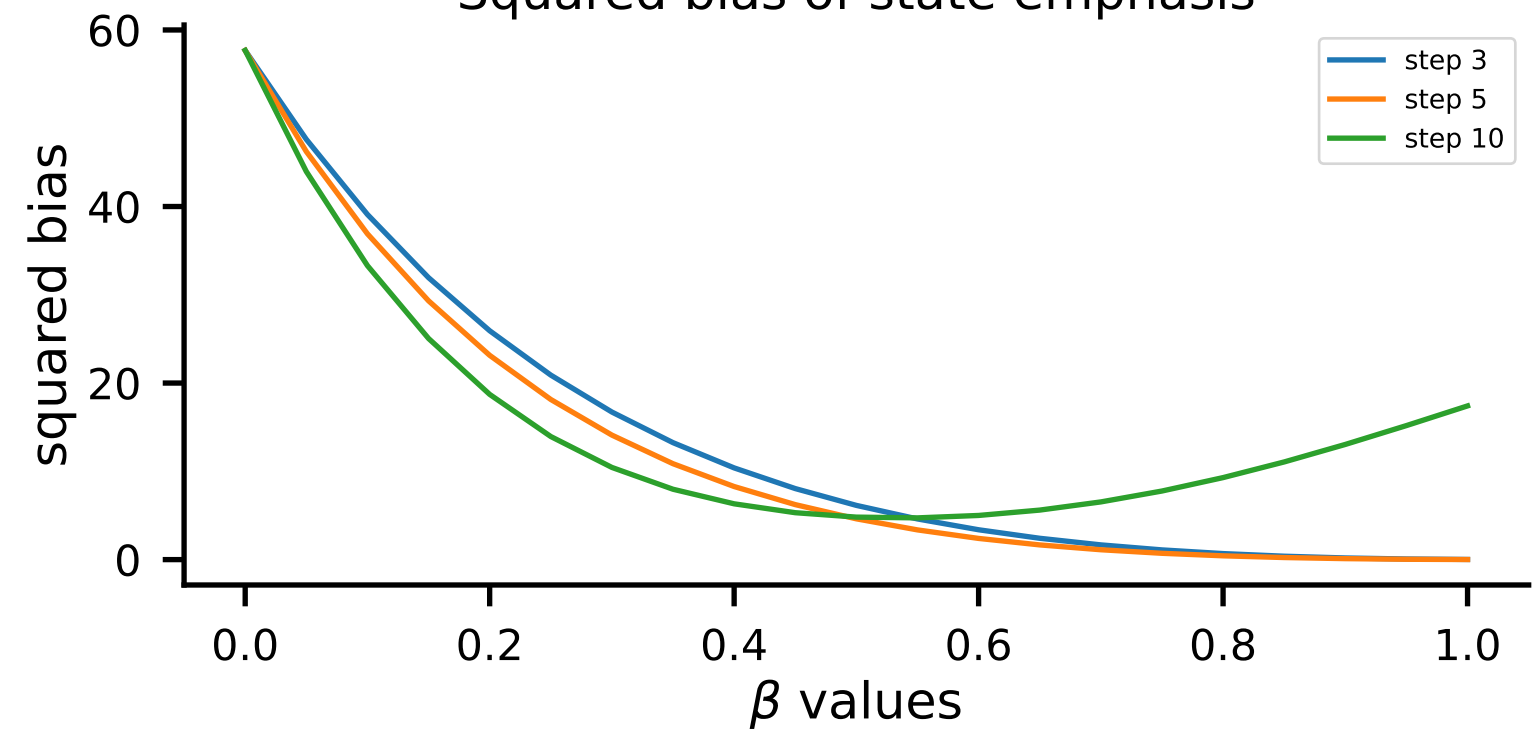

Supplement: supplementary_material [file attachment]

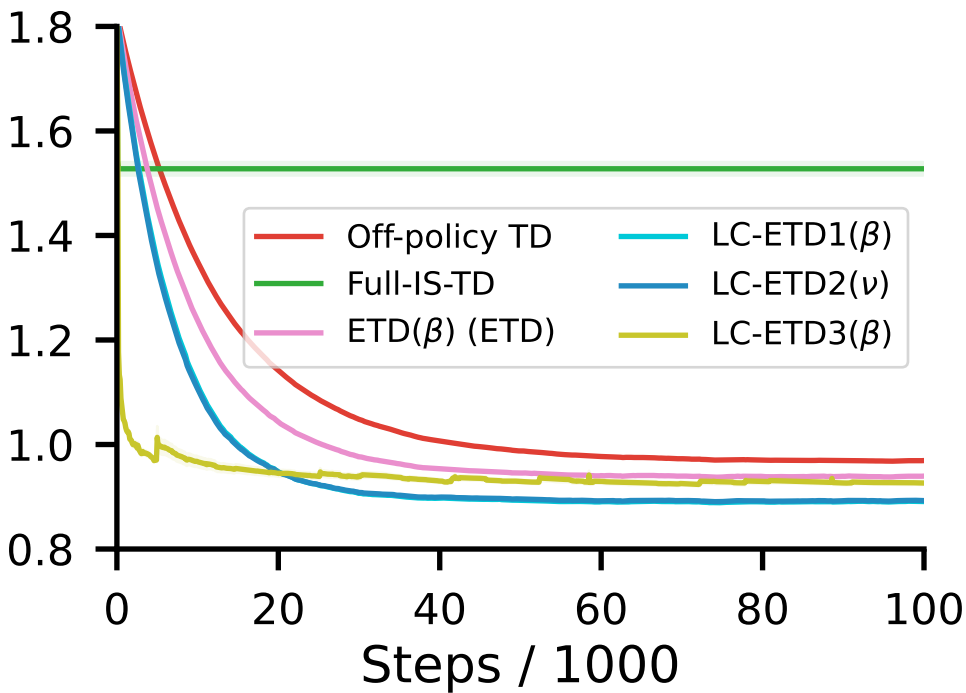

Supplement: supplementary_material [file attachment]

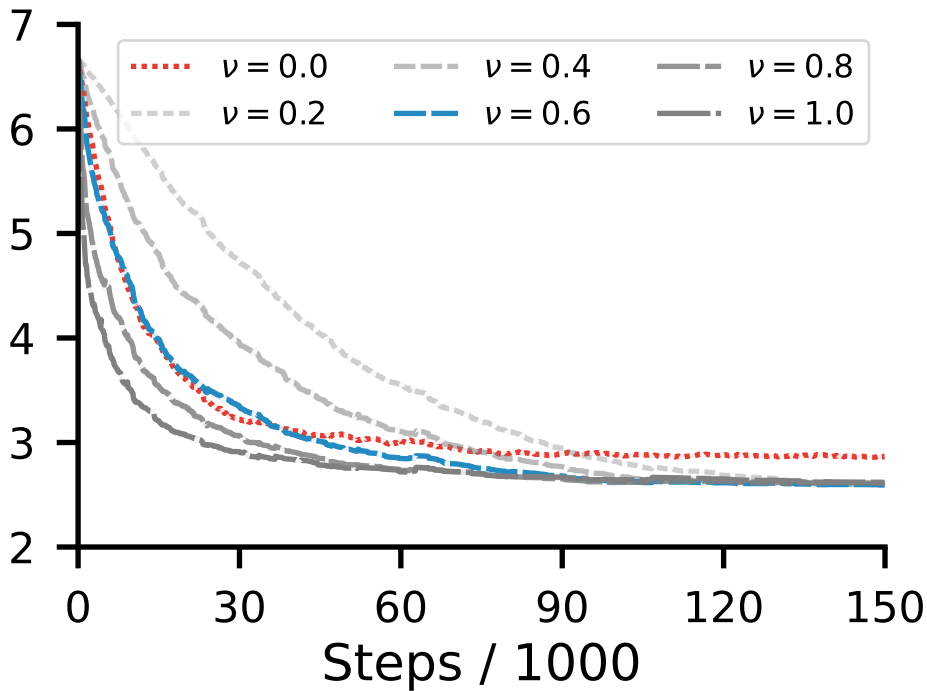

Supplement: supplementary_material [file attachment]

LC-ETD1( $\beta$ )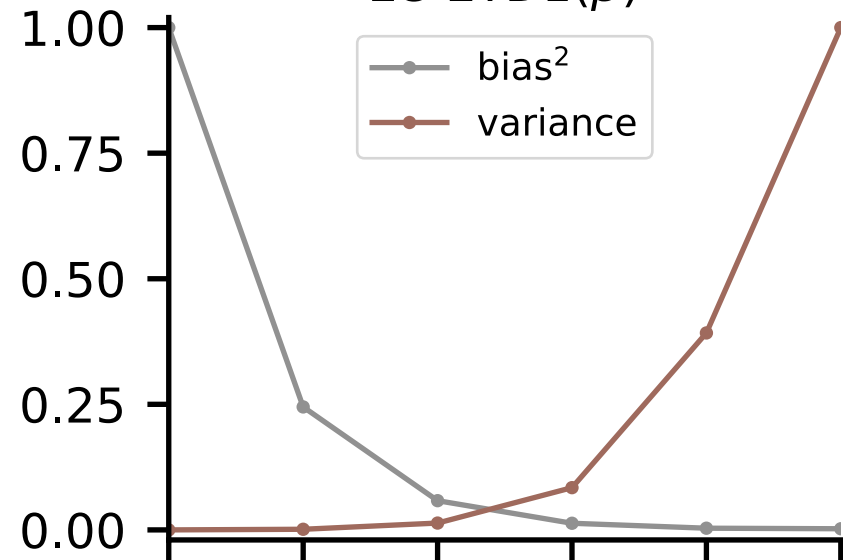LC-ETD2( $\nu$ )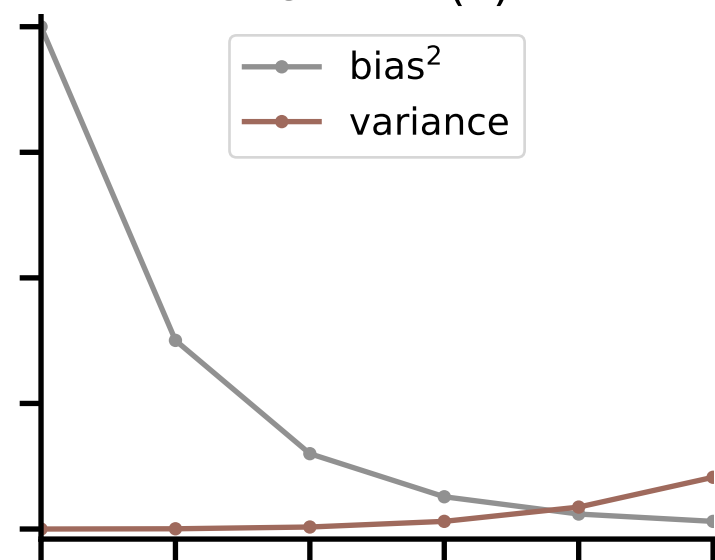LC-ETD3( $\beta$ )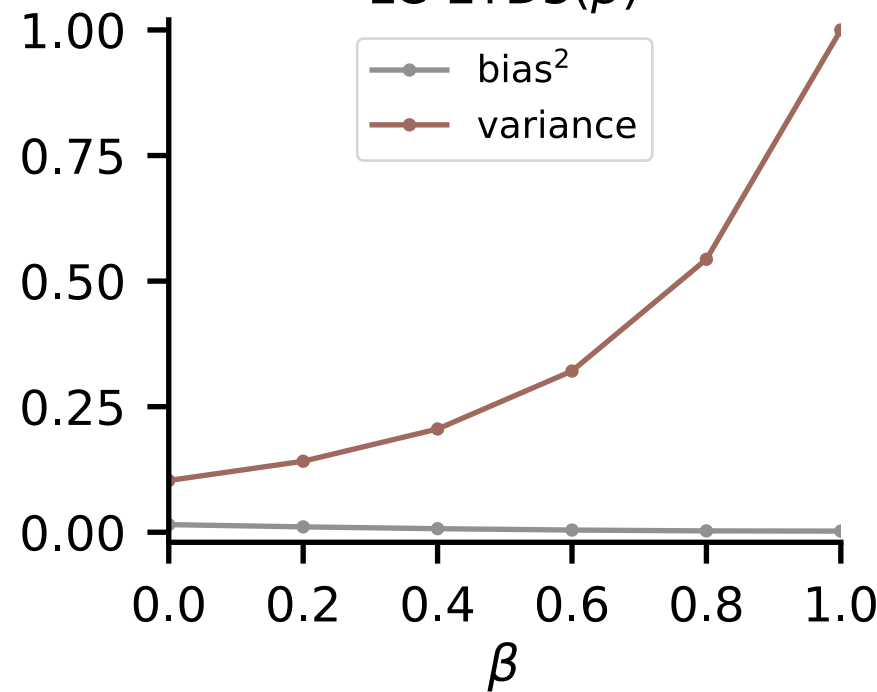Scaled ETD( $\beta$ )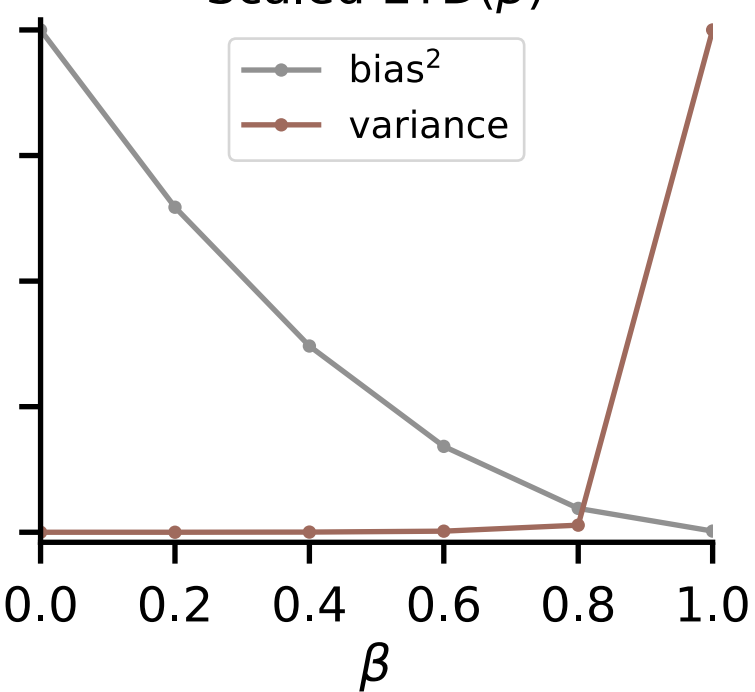

Supplement: supplementary_material [file attachment]

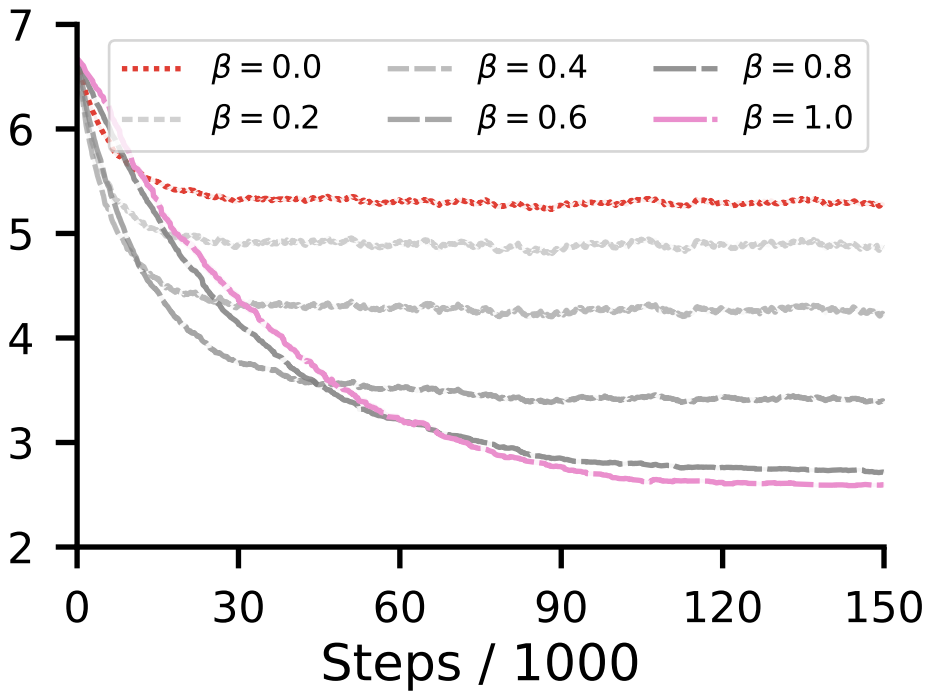

Supplement: supplementary_material [file attachment]

ETD( $\beta$ )

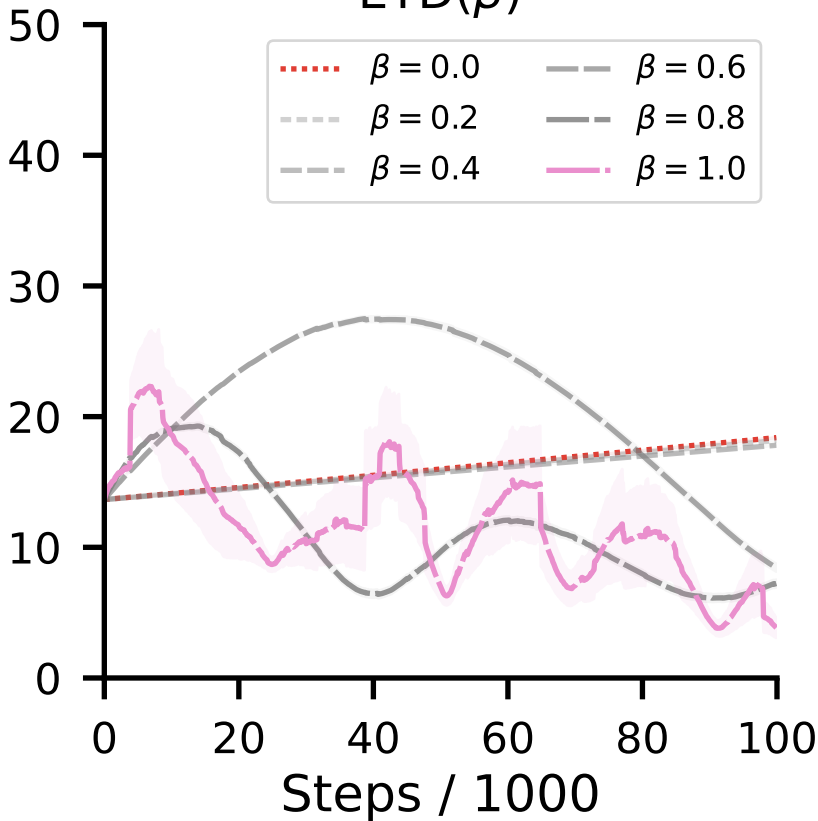

Supplement: supplementary_material [file attachment]

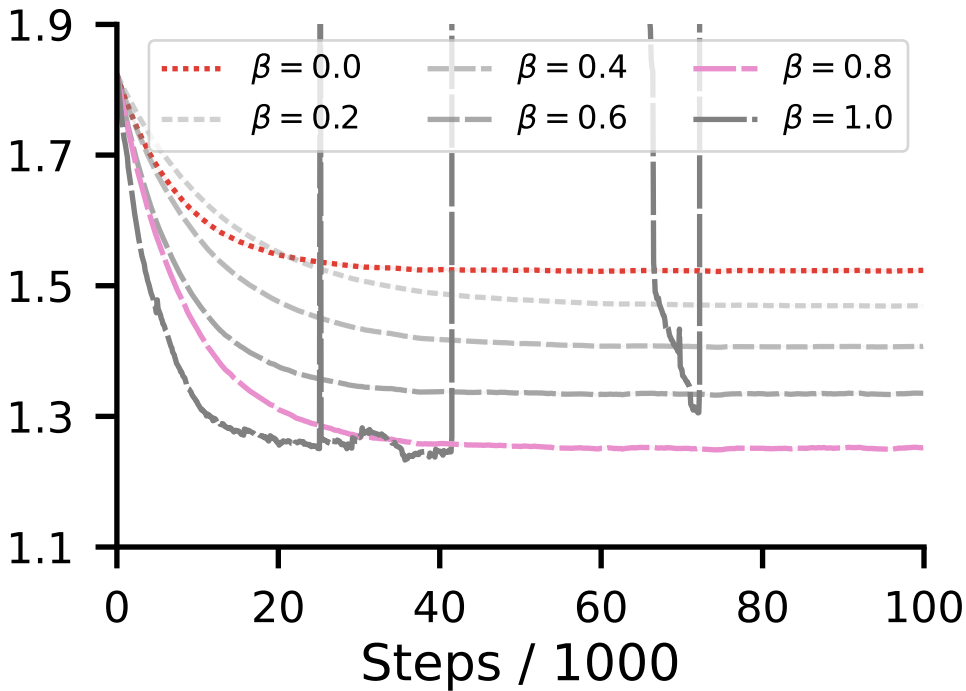

Supplement: supplementary_material [file attachment]

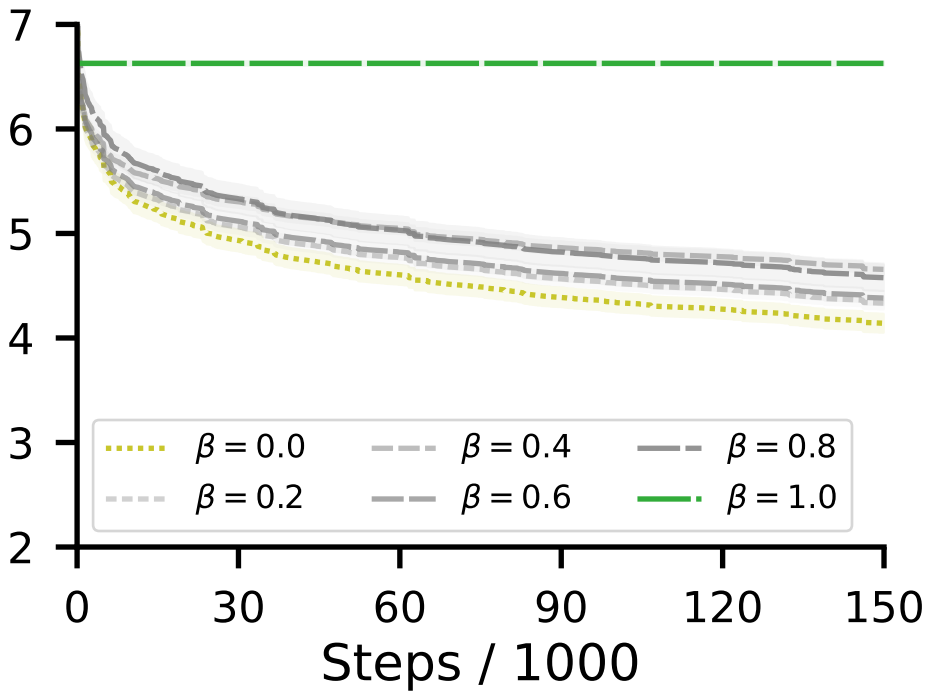

Supplement: supplementary_material [file attachment]

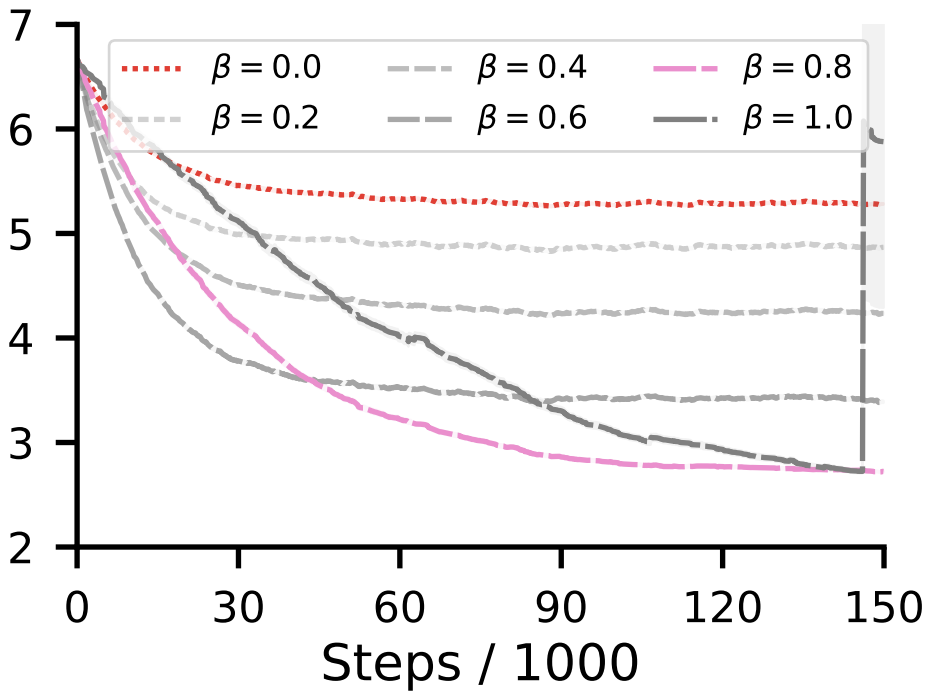

Supplement: supplementary_material [file attachment]

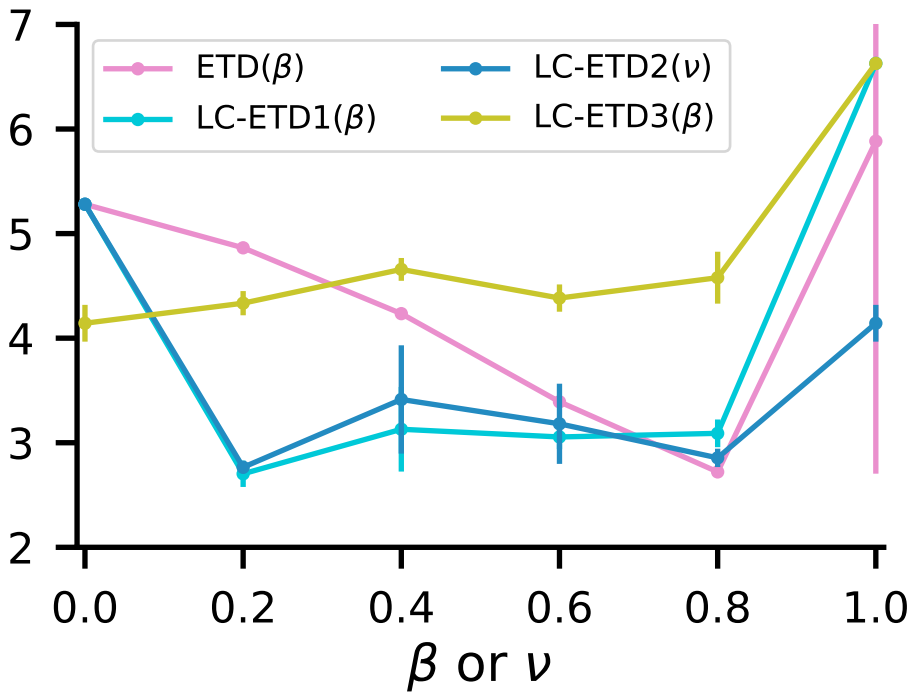

Supplement: supplementary_material [file attachment]

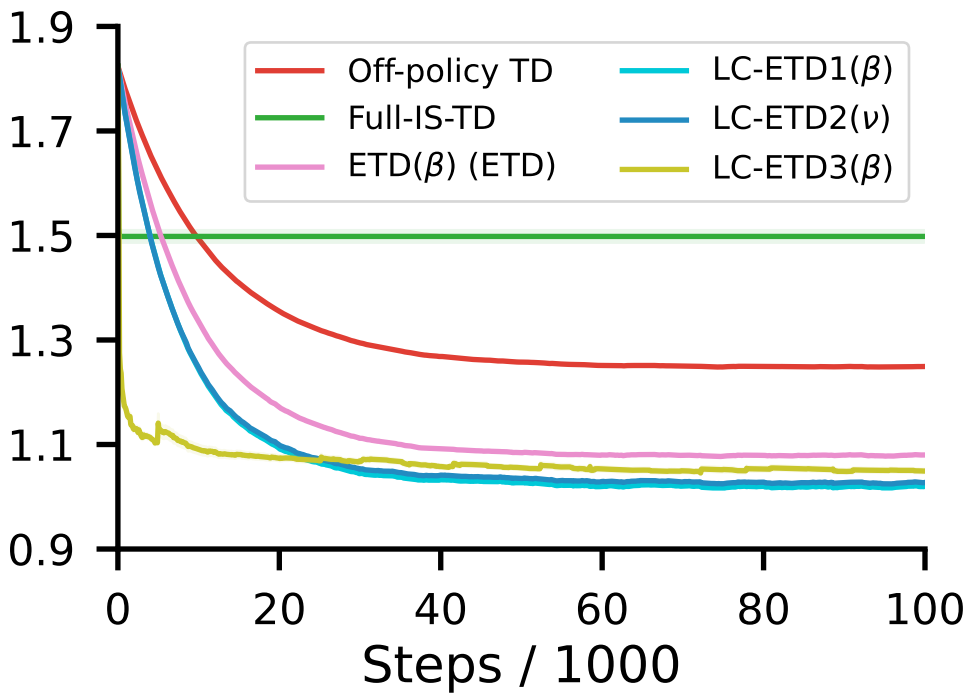

Supplement: supplementary_material [file attachment]

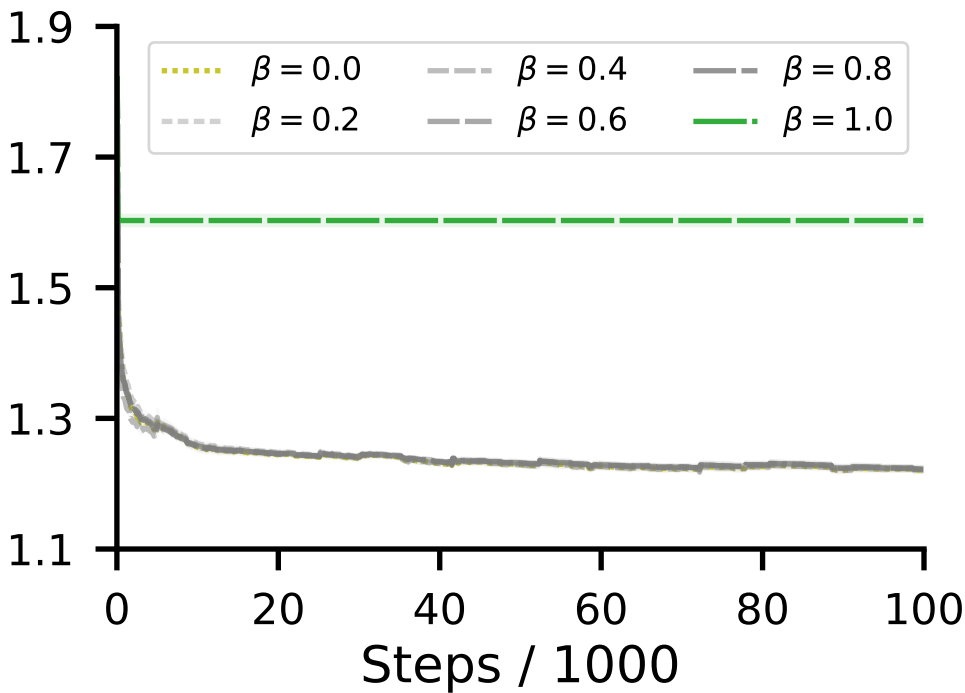

Supplement: supplementary_material [file attachment]

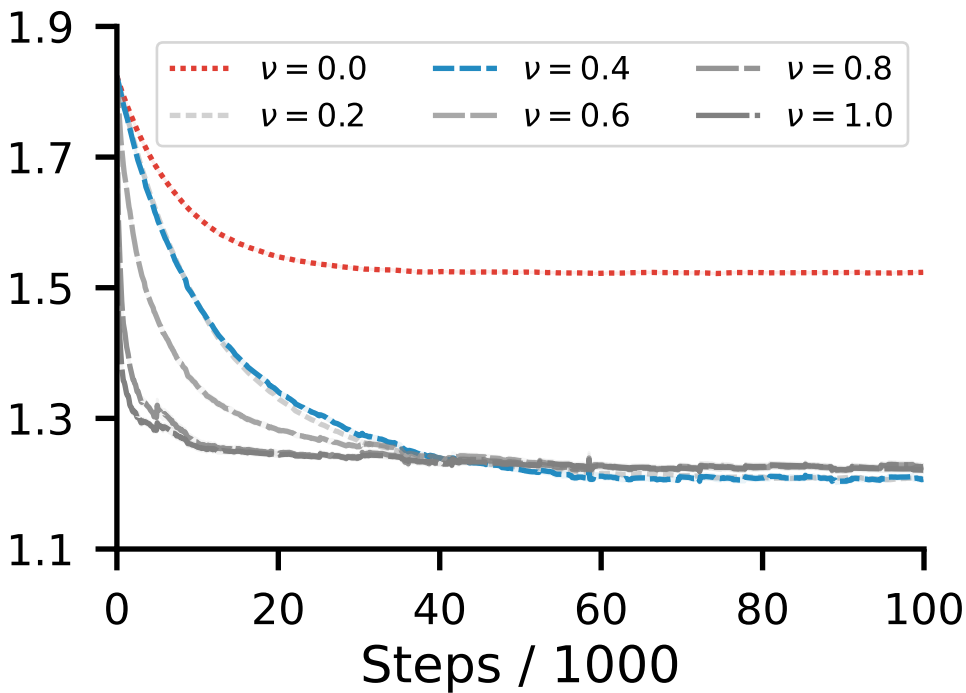

Supplement: supplementary_material [file attachment]

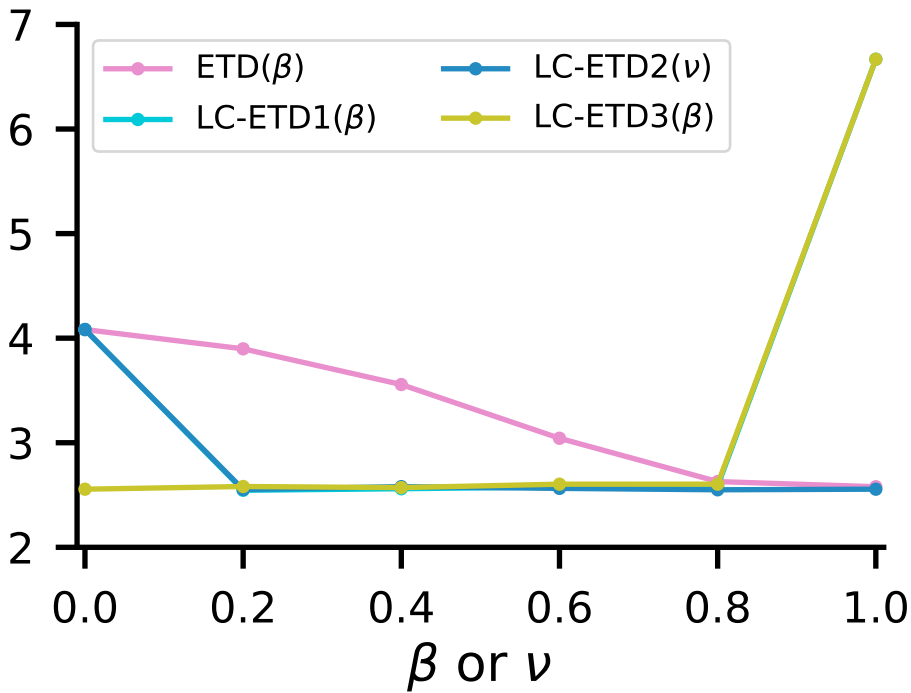

Supplement: supplementary_material [file attachment]

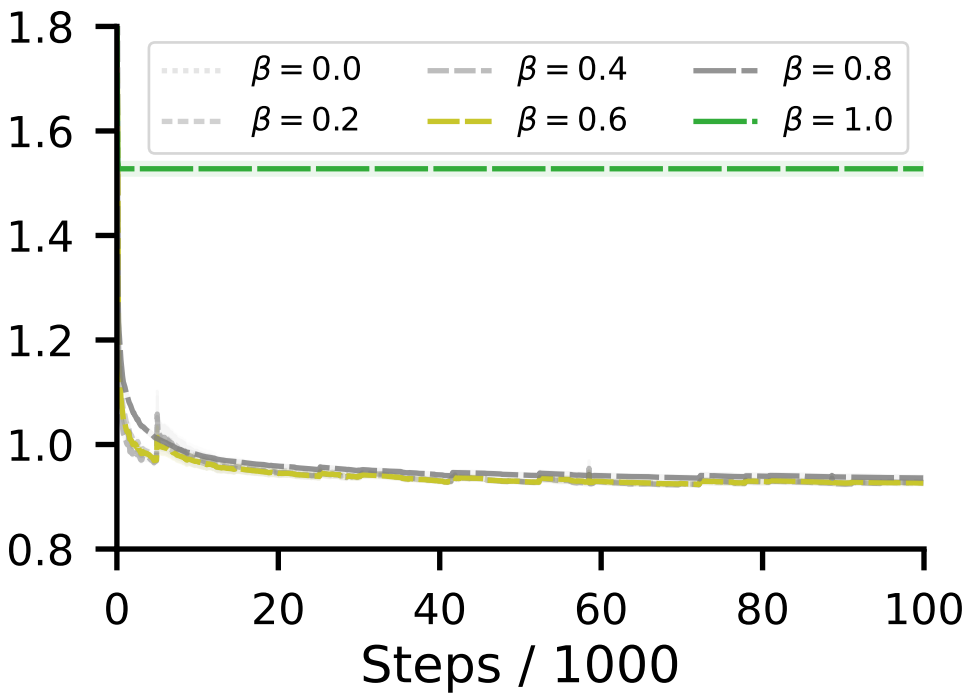

Supplement: supplementary_material [file attachment]

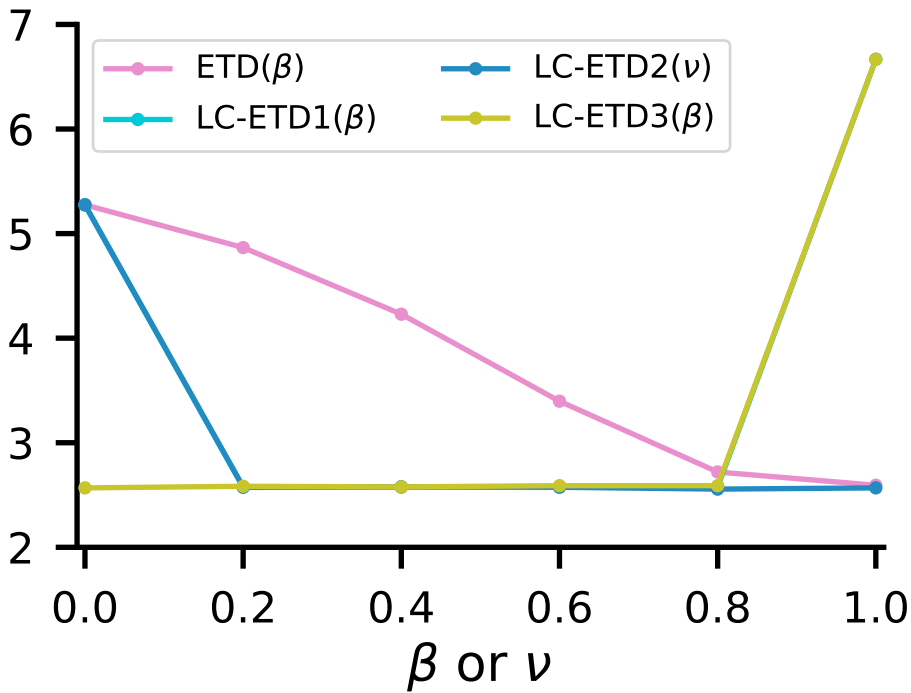

Supplement: supplementary_material [file attachment]

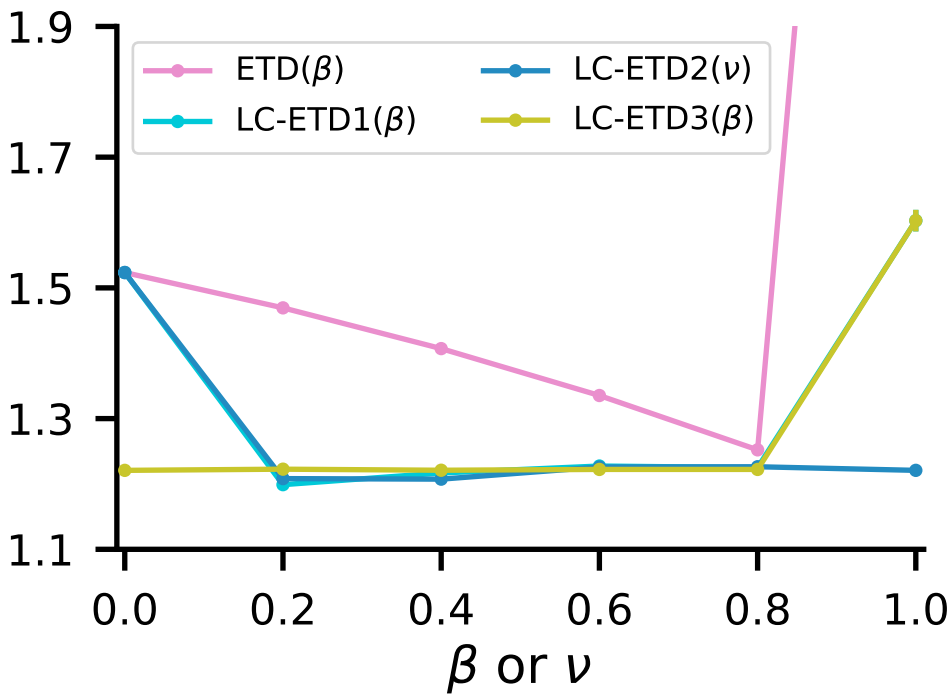

Supplement: supplementary_material [file attachment]

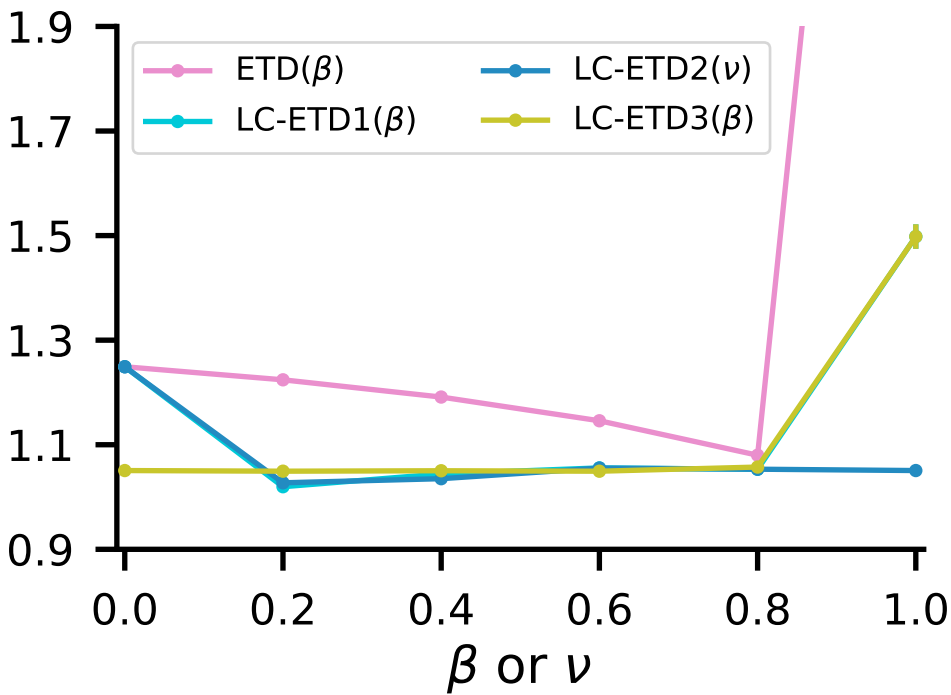

Supplement: supplementary_material [file attachment]

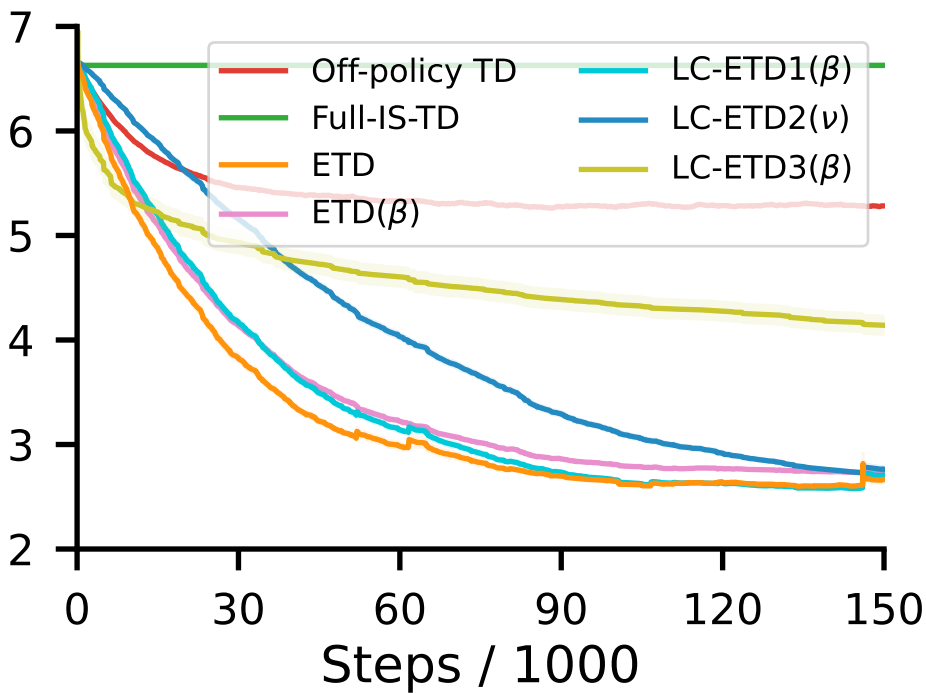

Supplement: supplementary_material [file attachment]

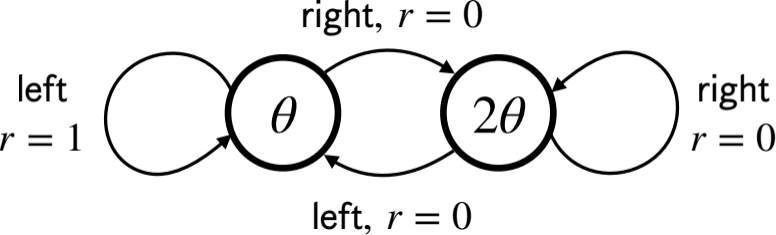

Supplement: supplementary_material [file attachment]

# Rooms

RMSVE

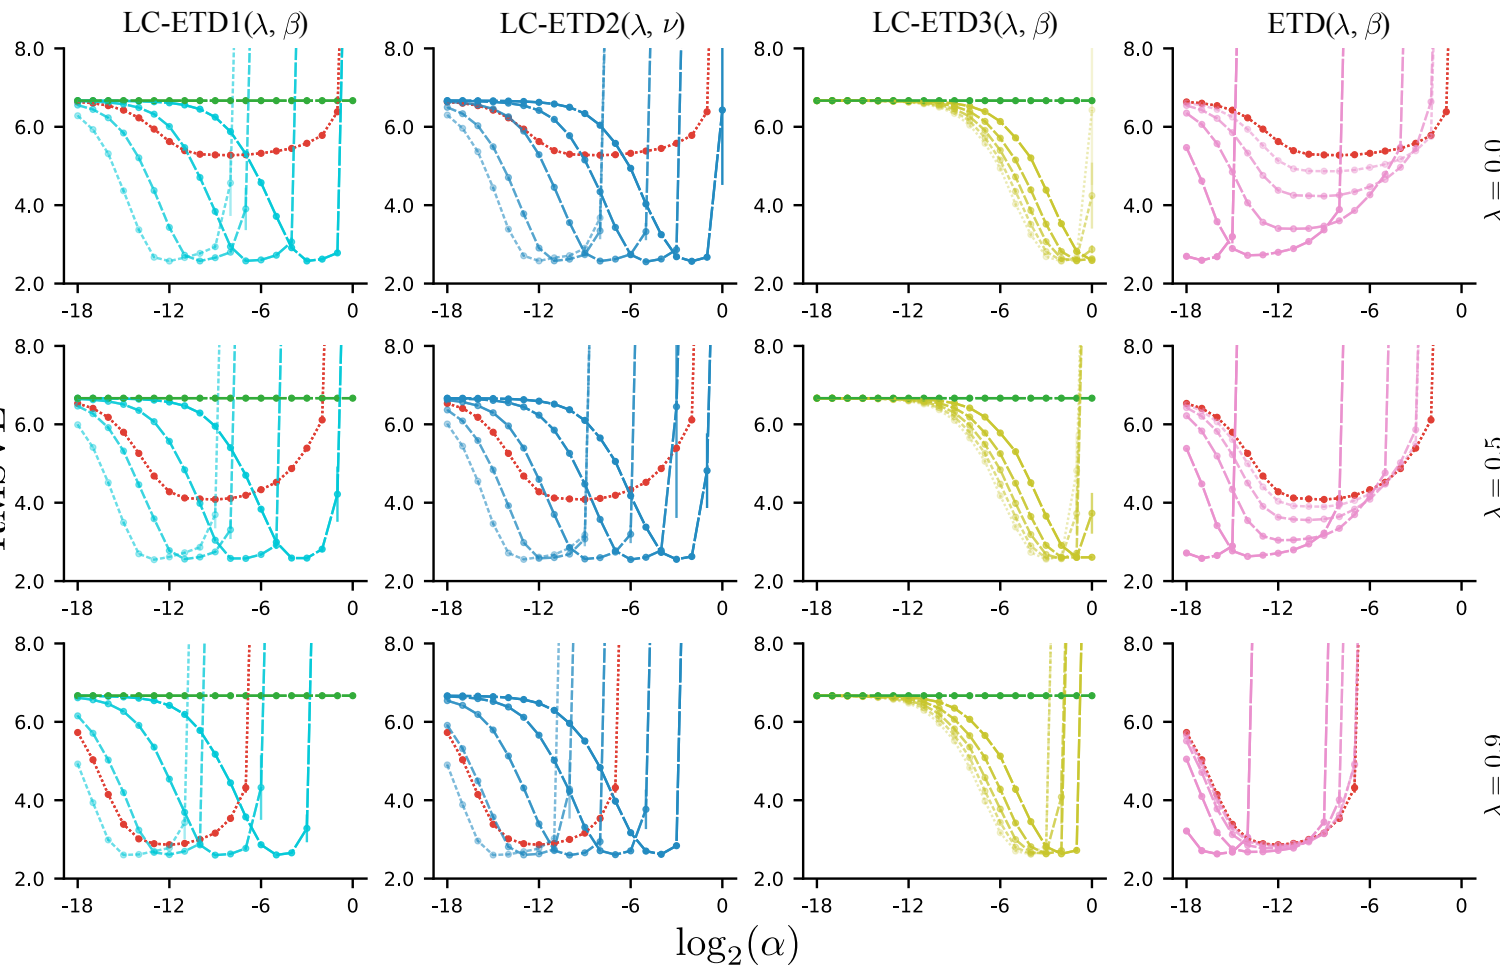

Supplement: supplementary_material [file attachment]

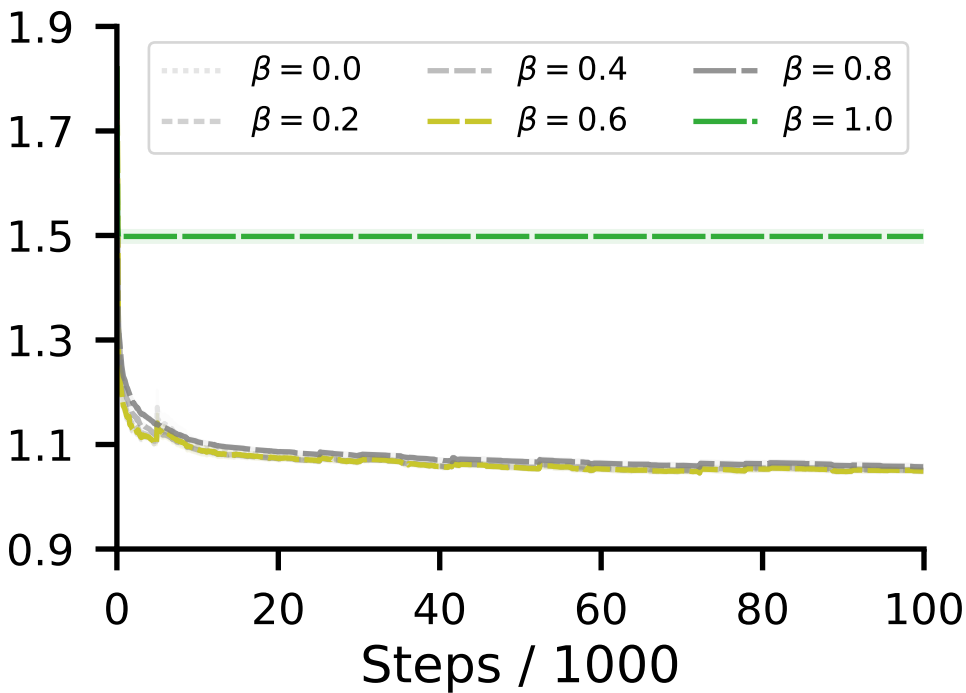

Supplement: supplementary_material [file attachment]

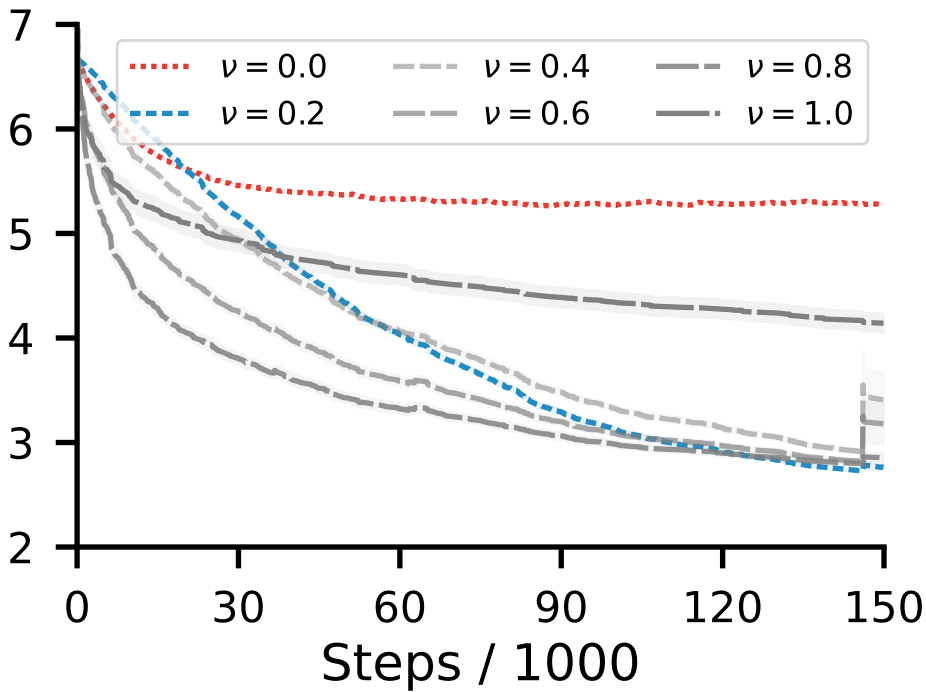

Supplement: supplementary_material [file attachment]

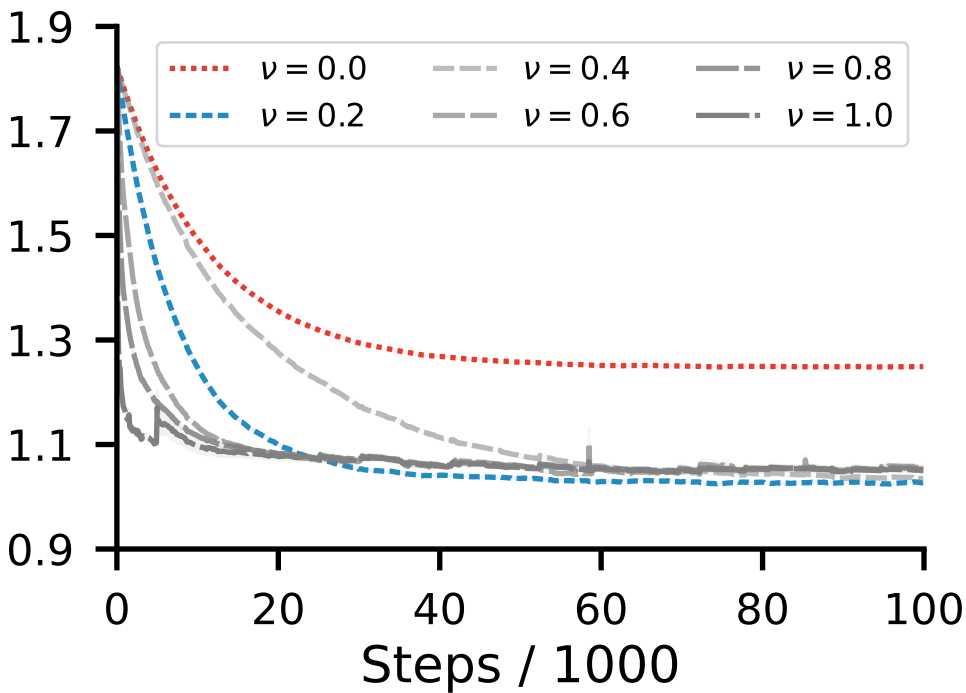

Supplement: supplementary_material [file attachment]

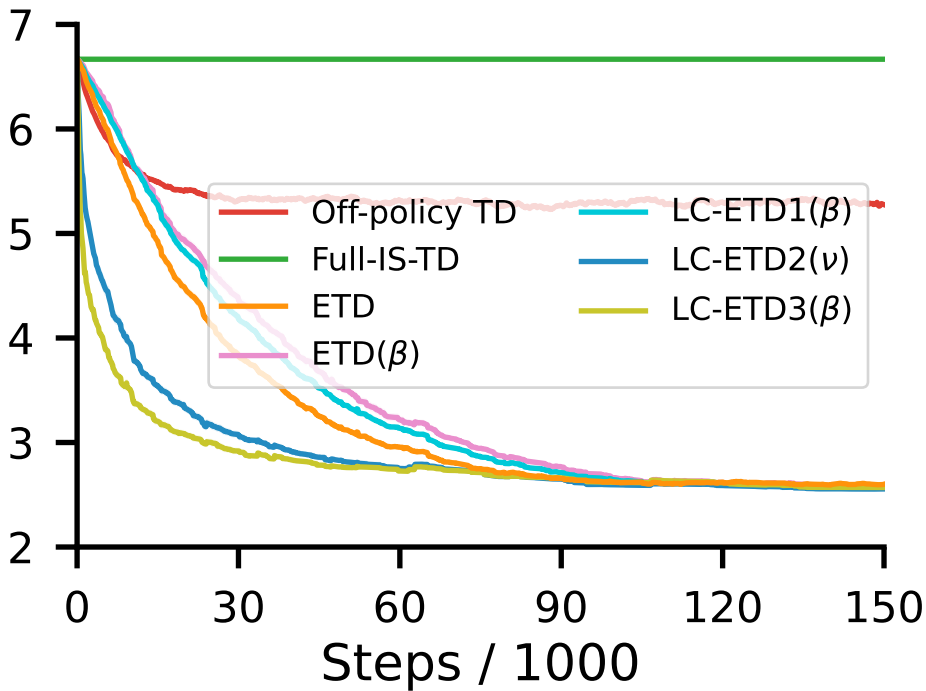

Supplement: supplementary_material [file attachment]

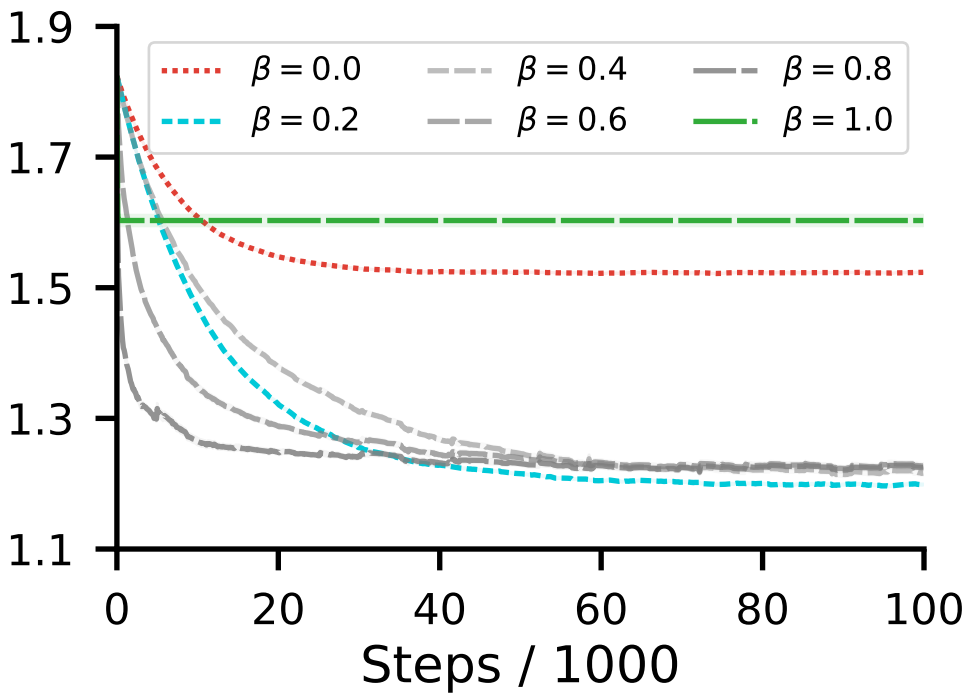

Supplement: supplementary_material [file attachment]

# Variances of state emphasis

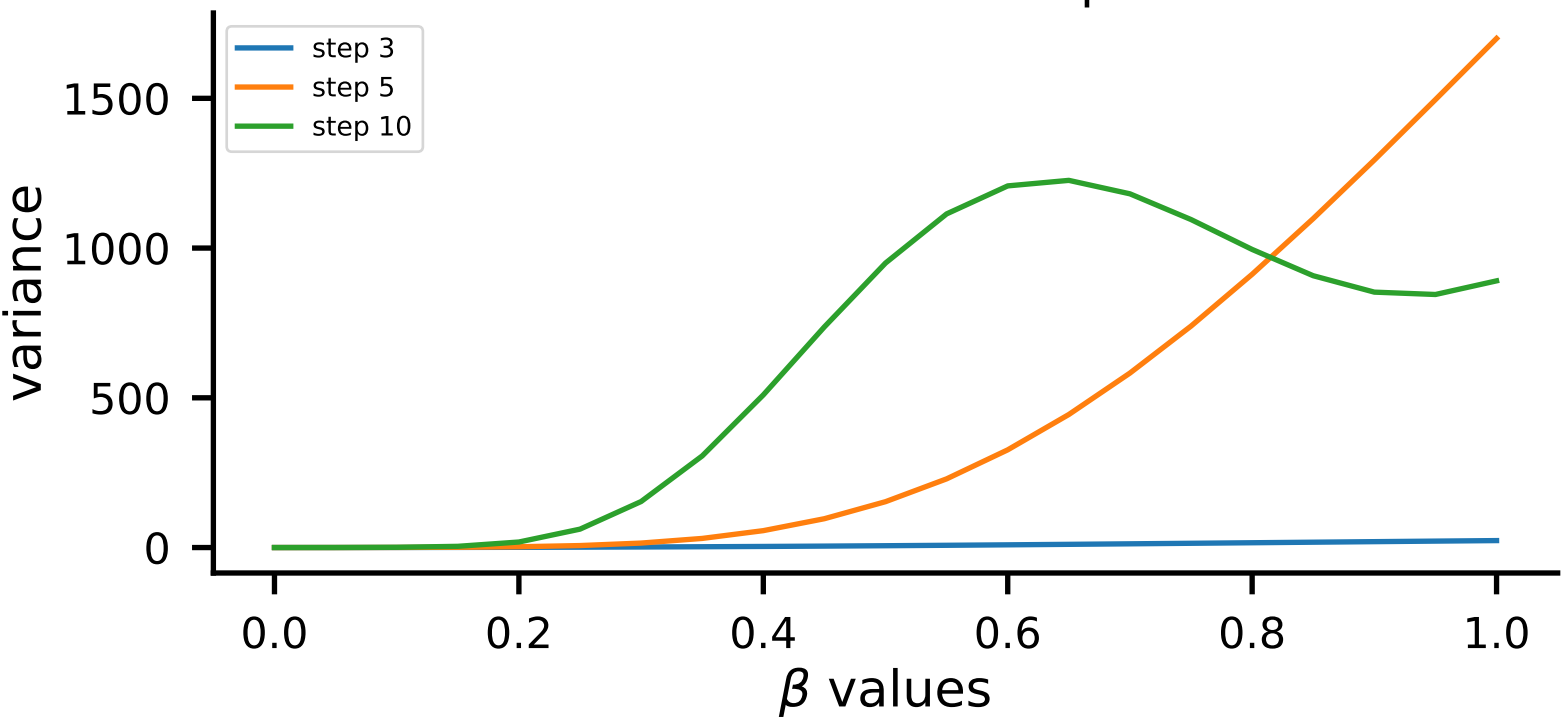

# Squared bias of state emphasis

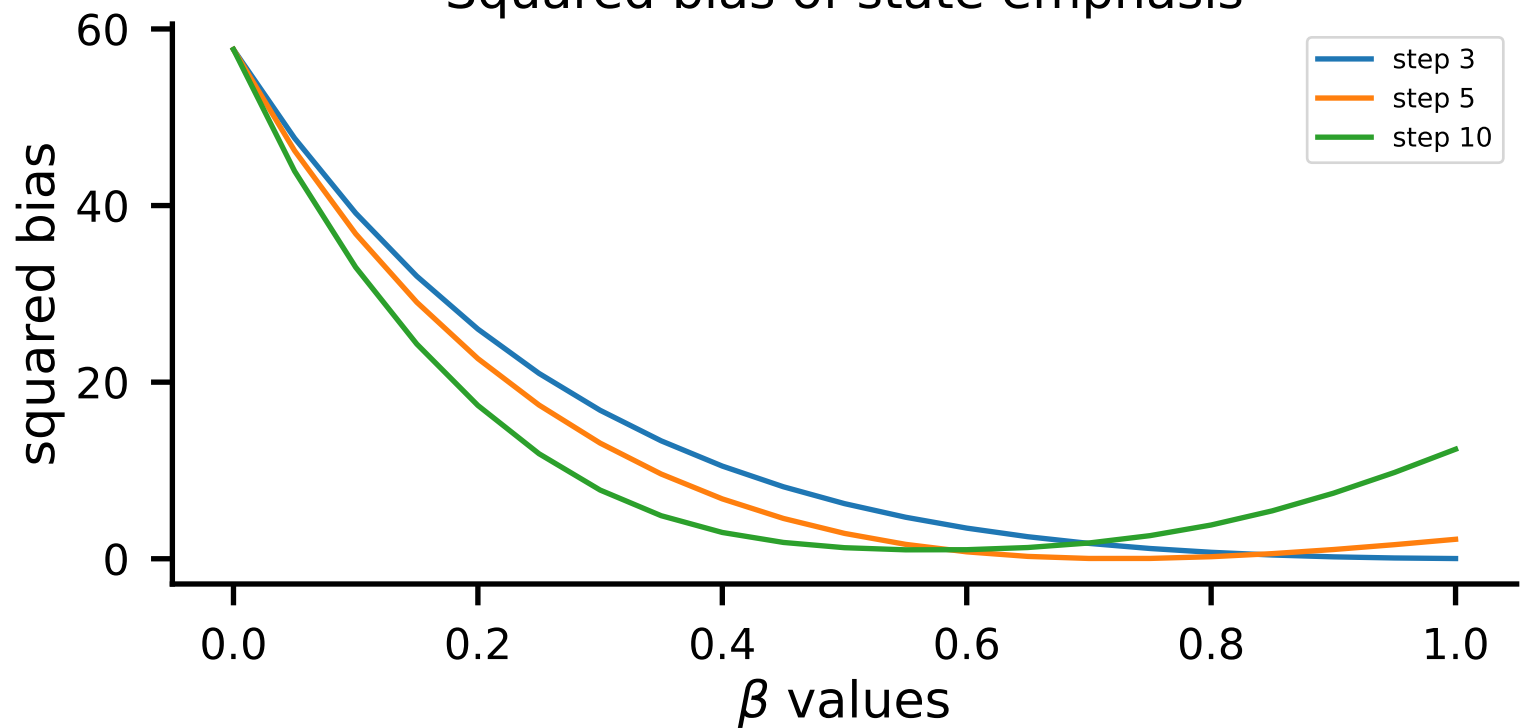

Supplement: supplementary_material [file attachment]

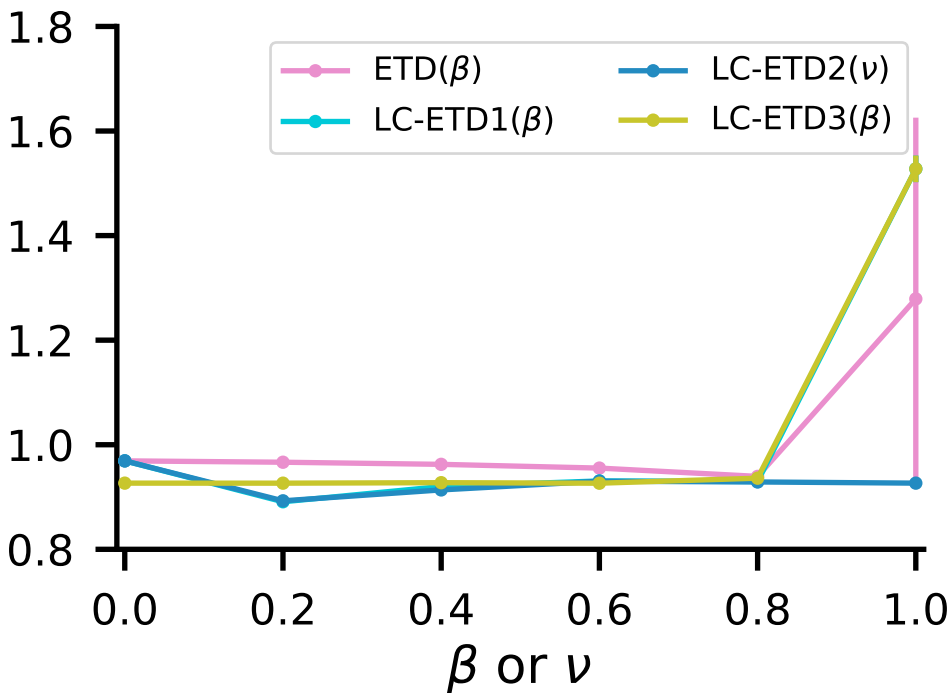

Supplement: supplementary_material [file attachment]

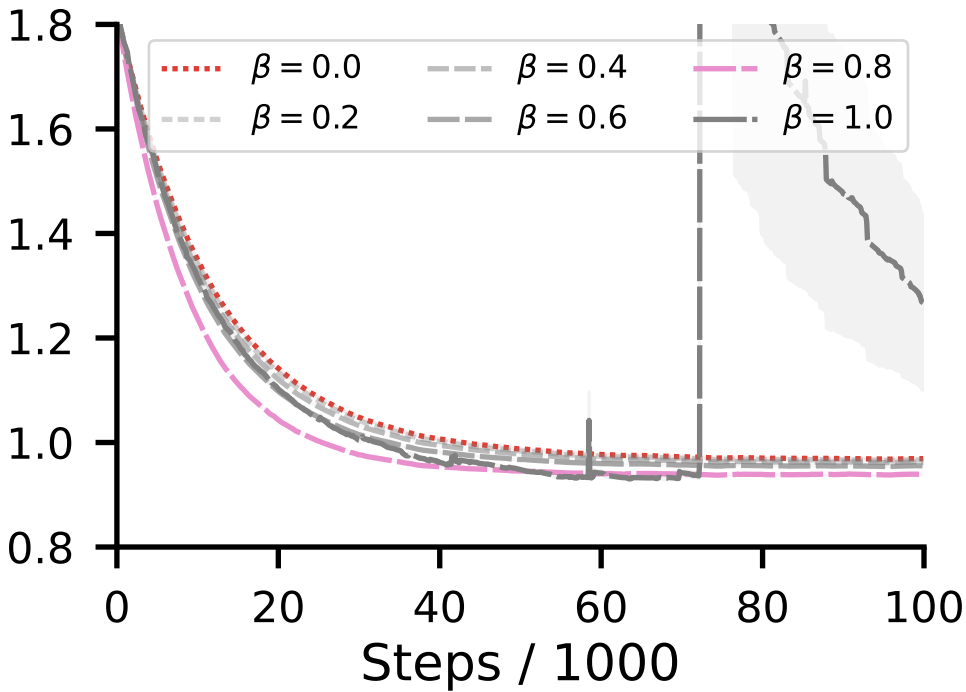

Supplement: supplementary_material [file attachment]

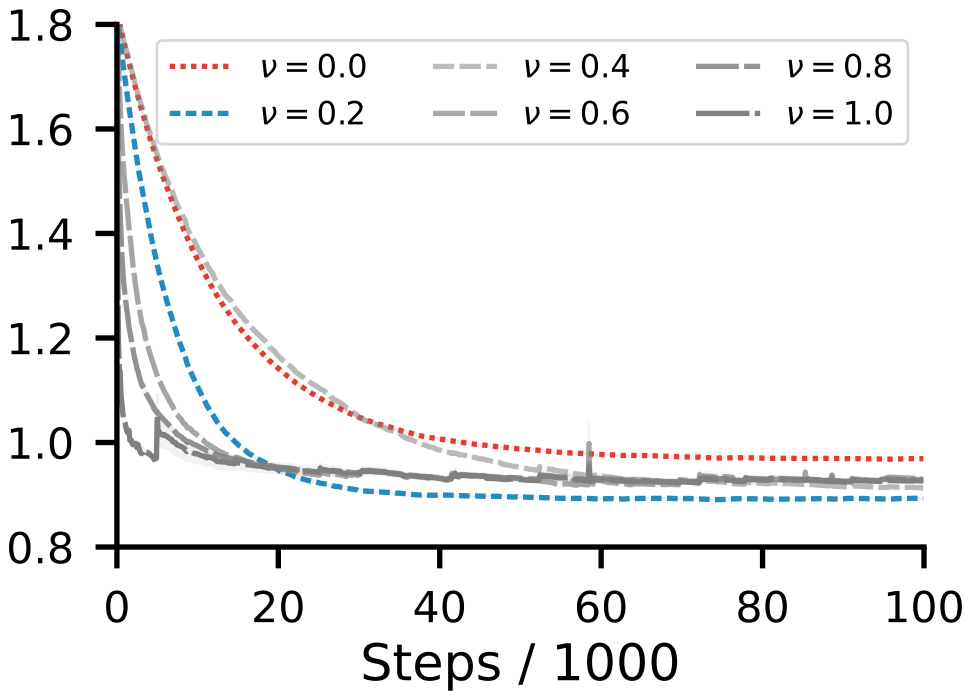

Supplement: supplementary_material [file attachment]

# Variances of state emphasis

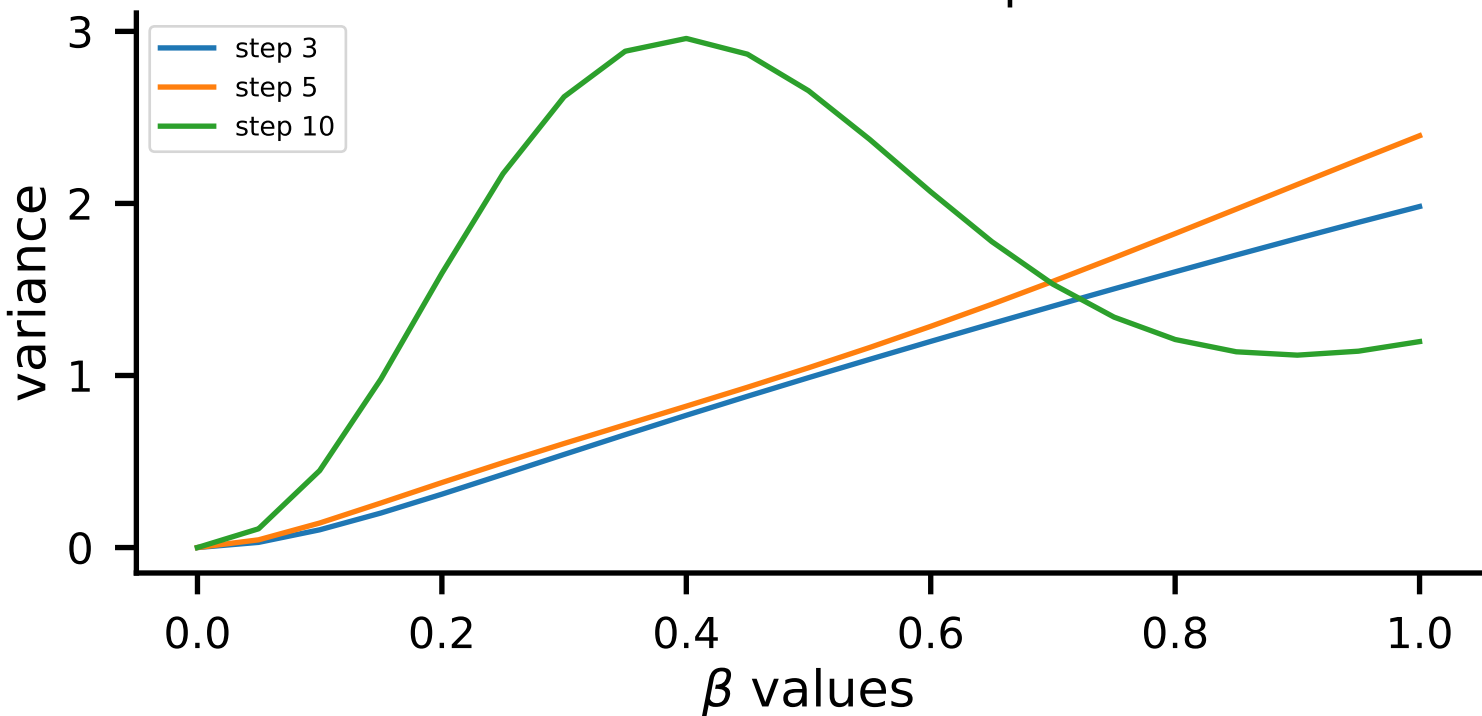

# Squared bias of state emphasis

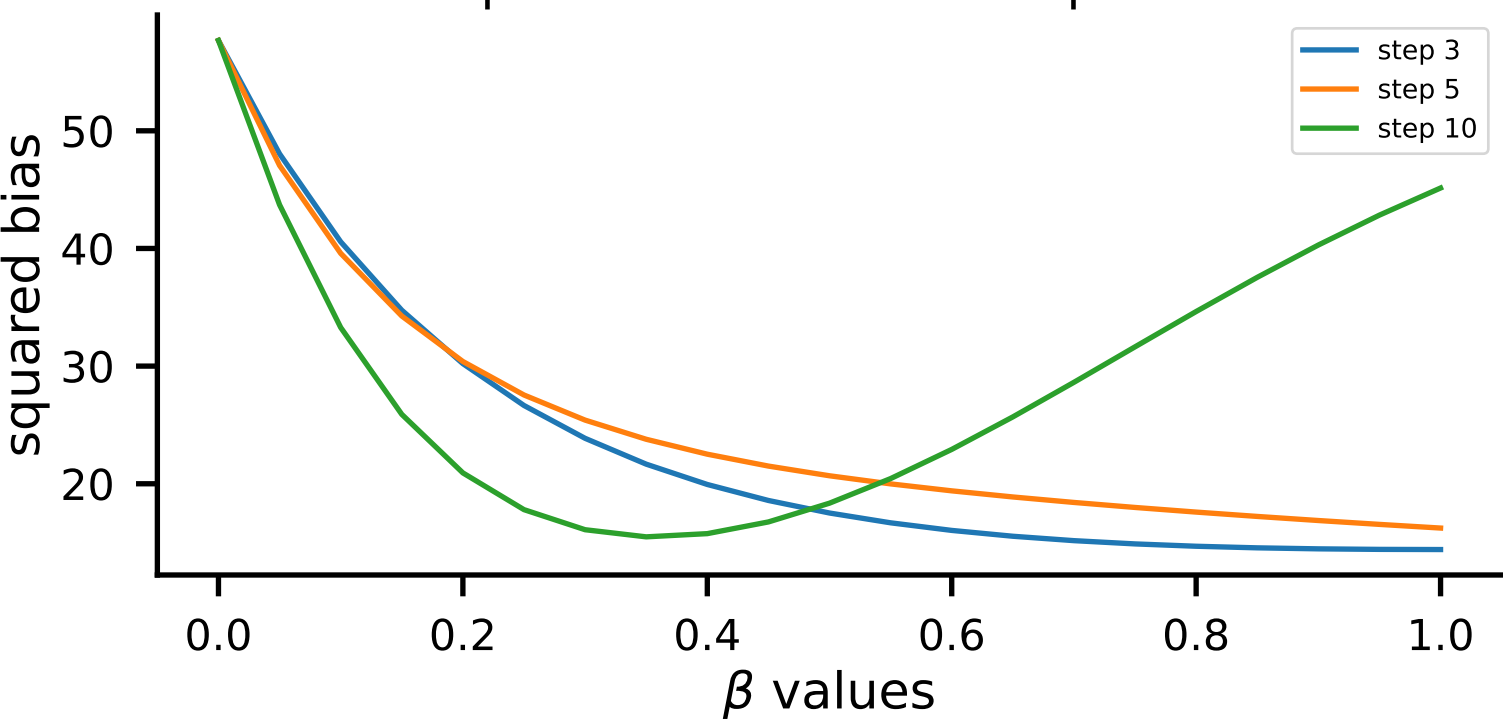

Supplement: supplementary_material [file attachment]

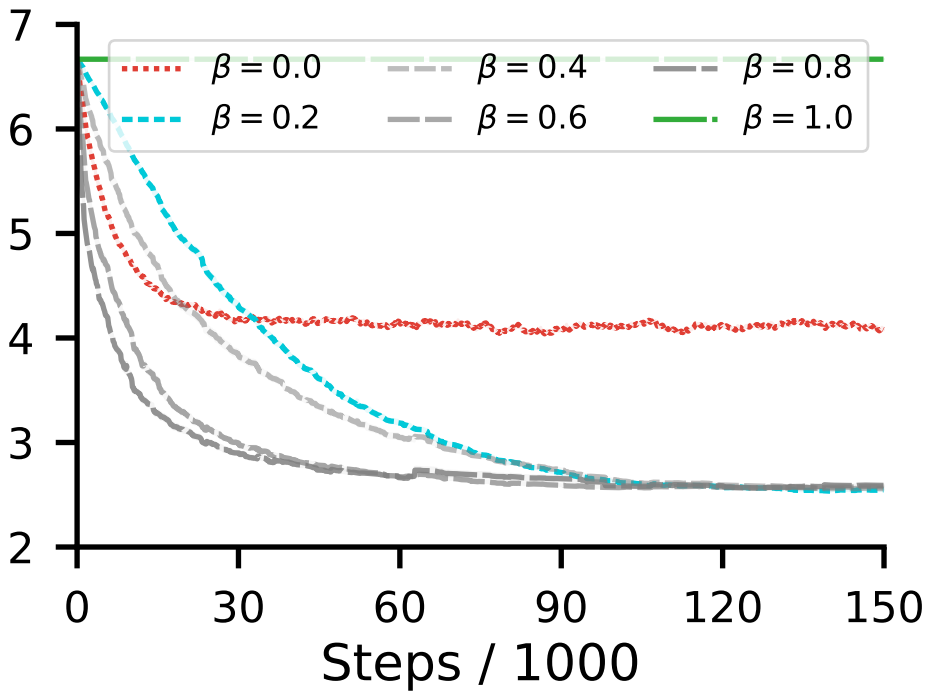

Supplement: supplementary_material [file attachment]

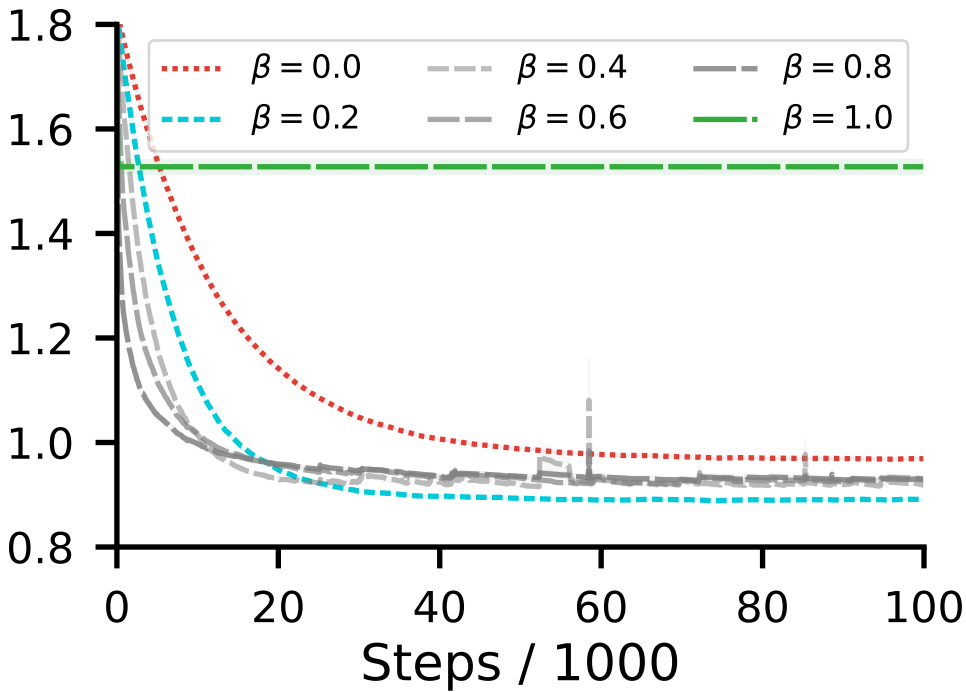

Supplement: supplementary_material [file attachment]

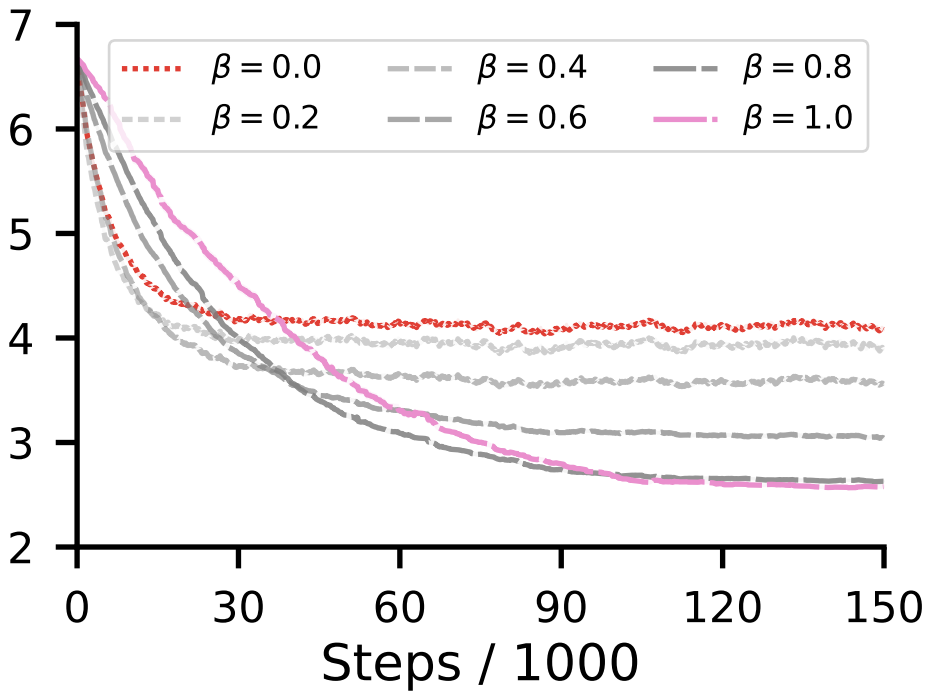

Supplement: supplementary_material [file attachment]

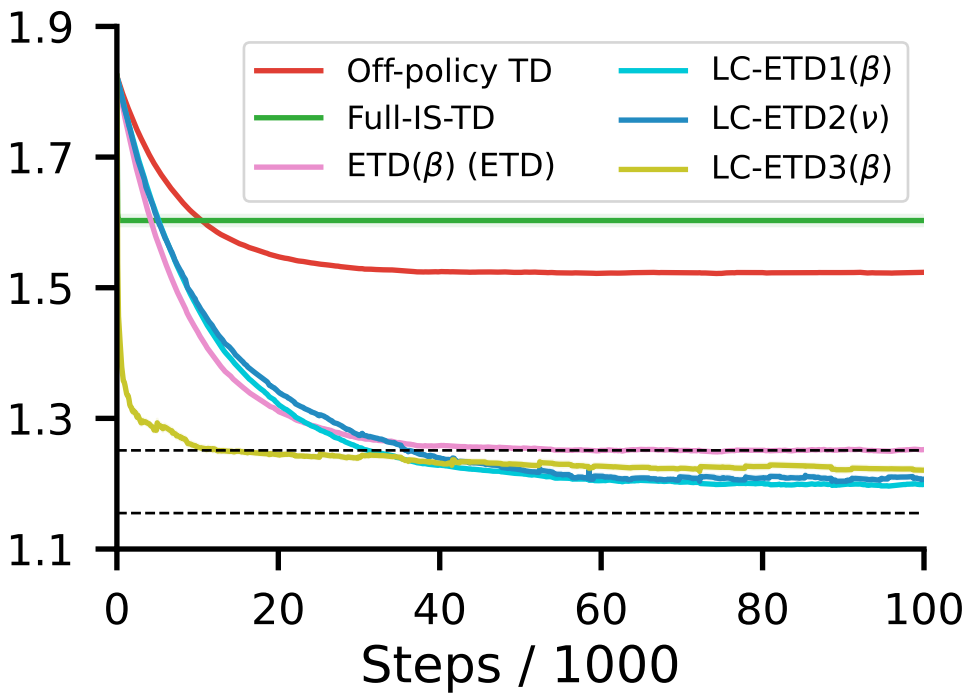

Supplement: supplementary_material [file attachment]

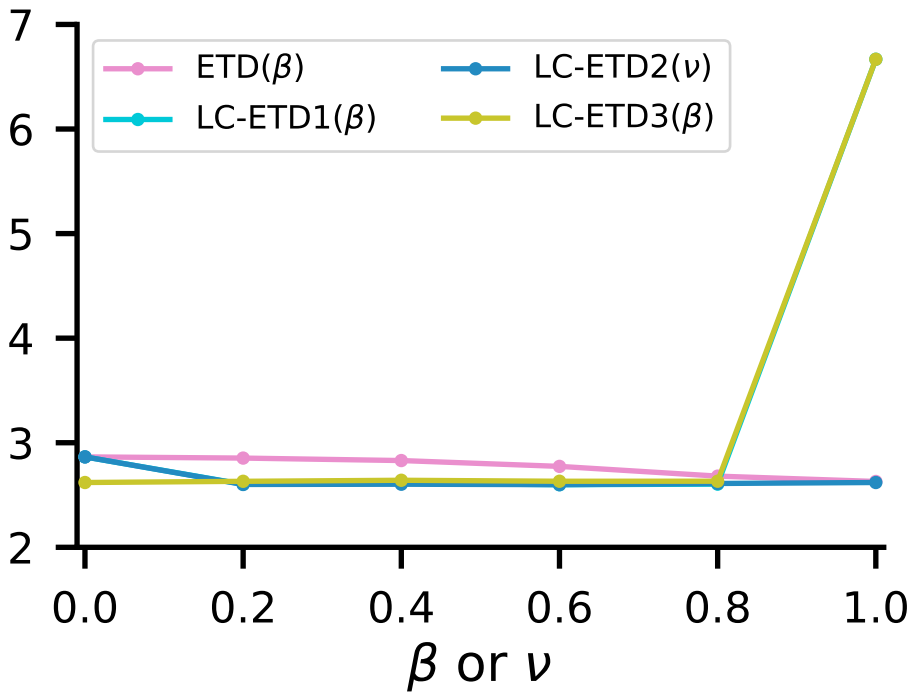

Supplement: supplementary_material [file attachment]

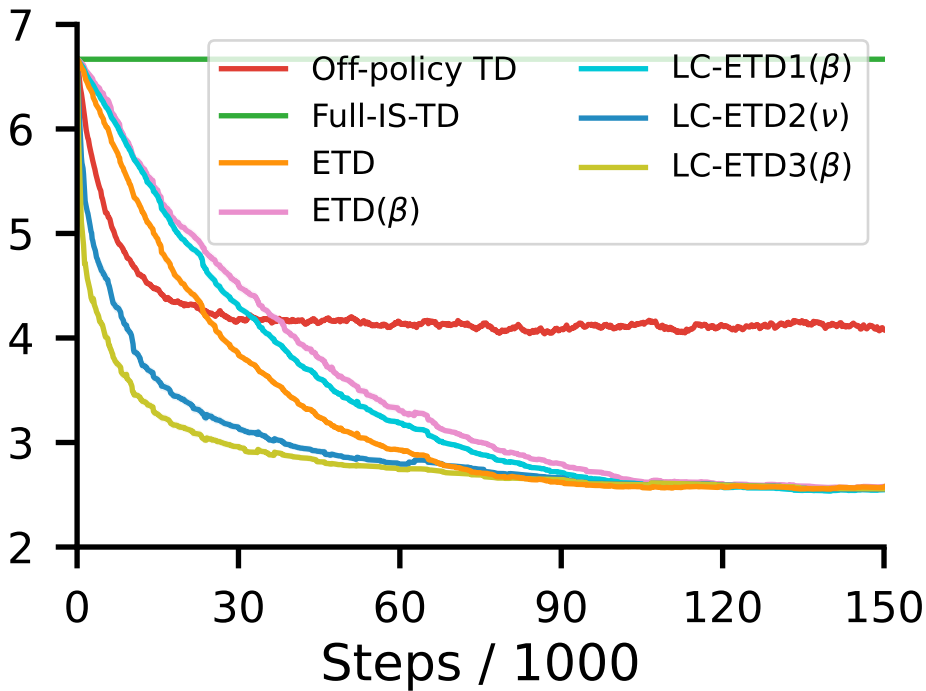

Supplement: supplementary_material [file attachment]

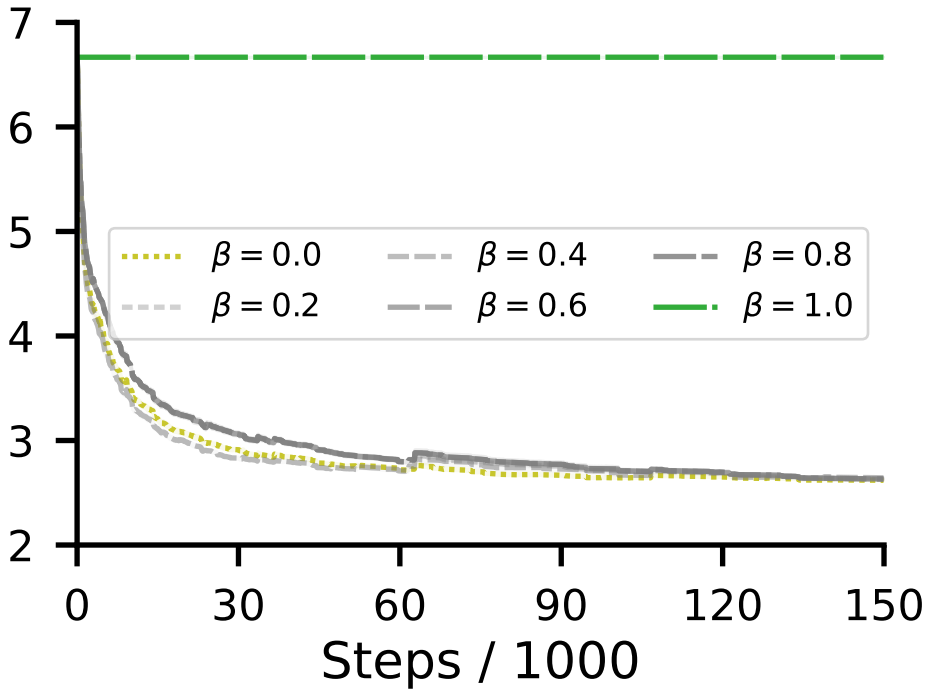

Supplement: supplementary_material [file attachment]

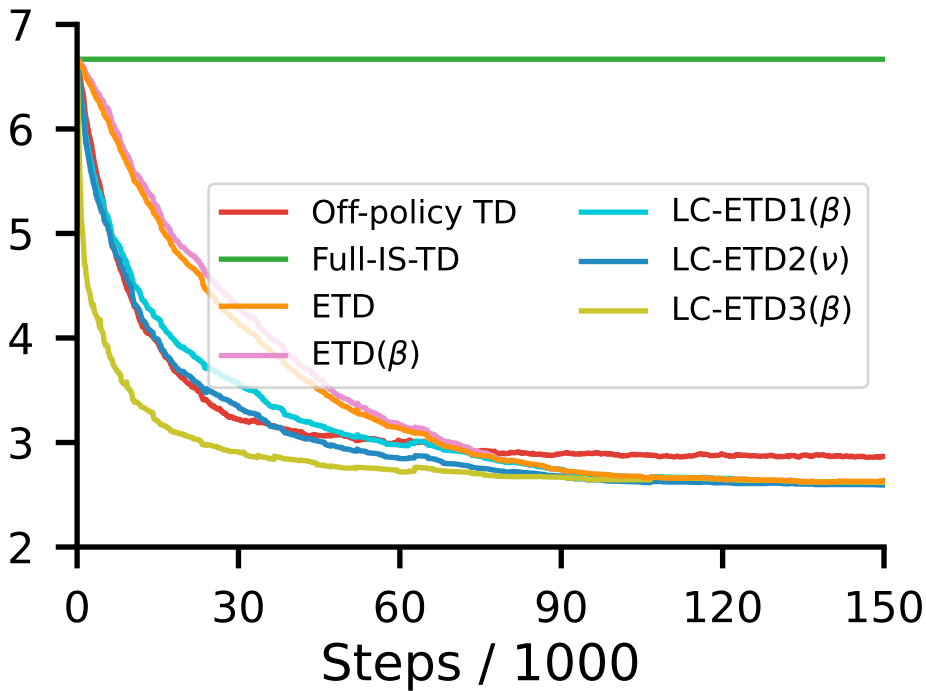

Supplement: supplementary_material [file attachment]

# LC-ETD3( $\beta$ )

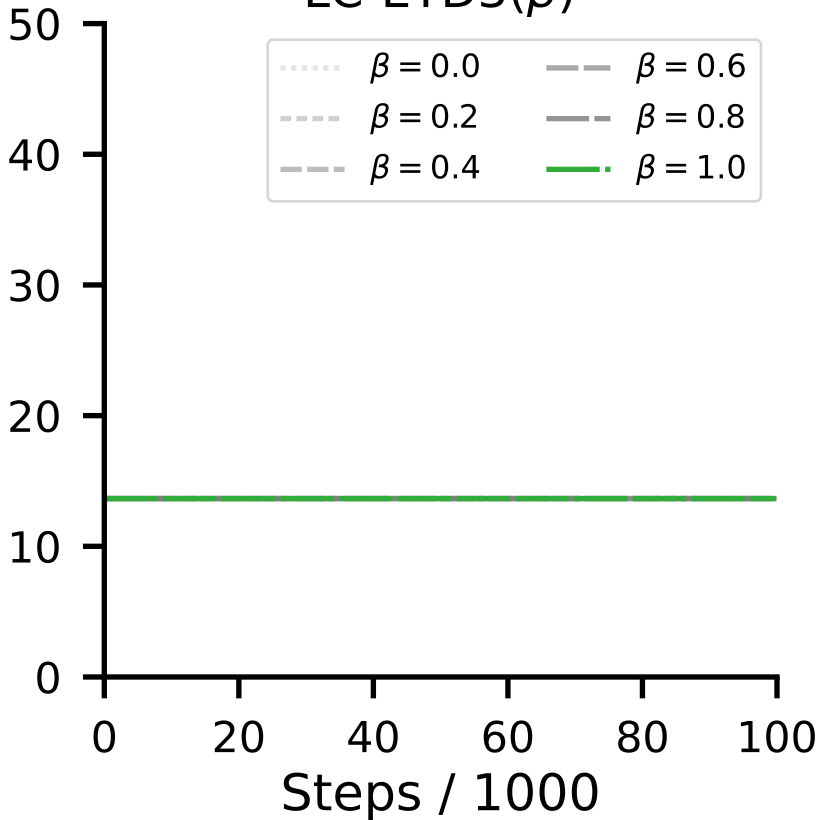

Supplement: supplementary_material [file attachment]

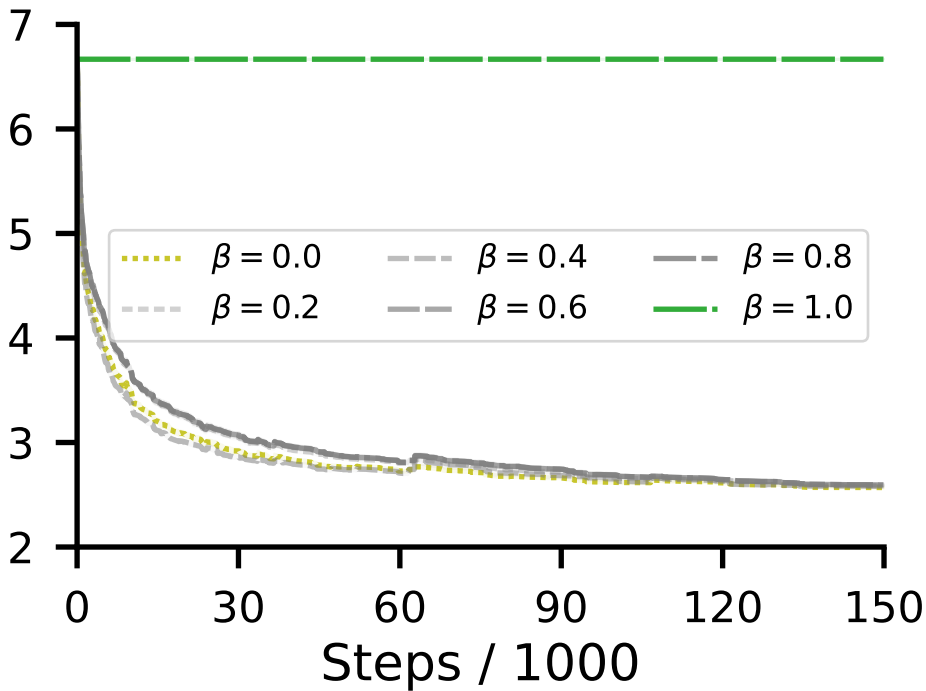

Supplement: supplementary_material [file attachment]

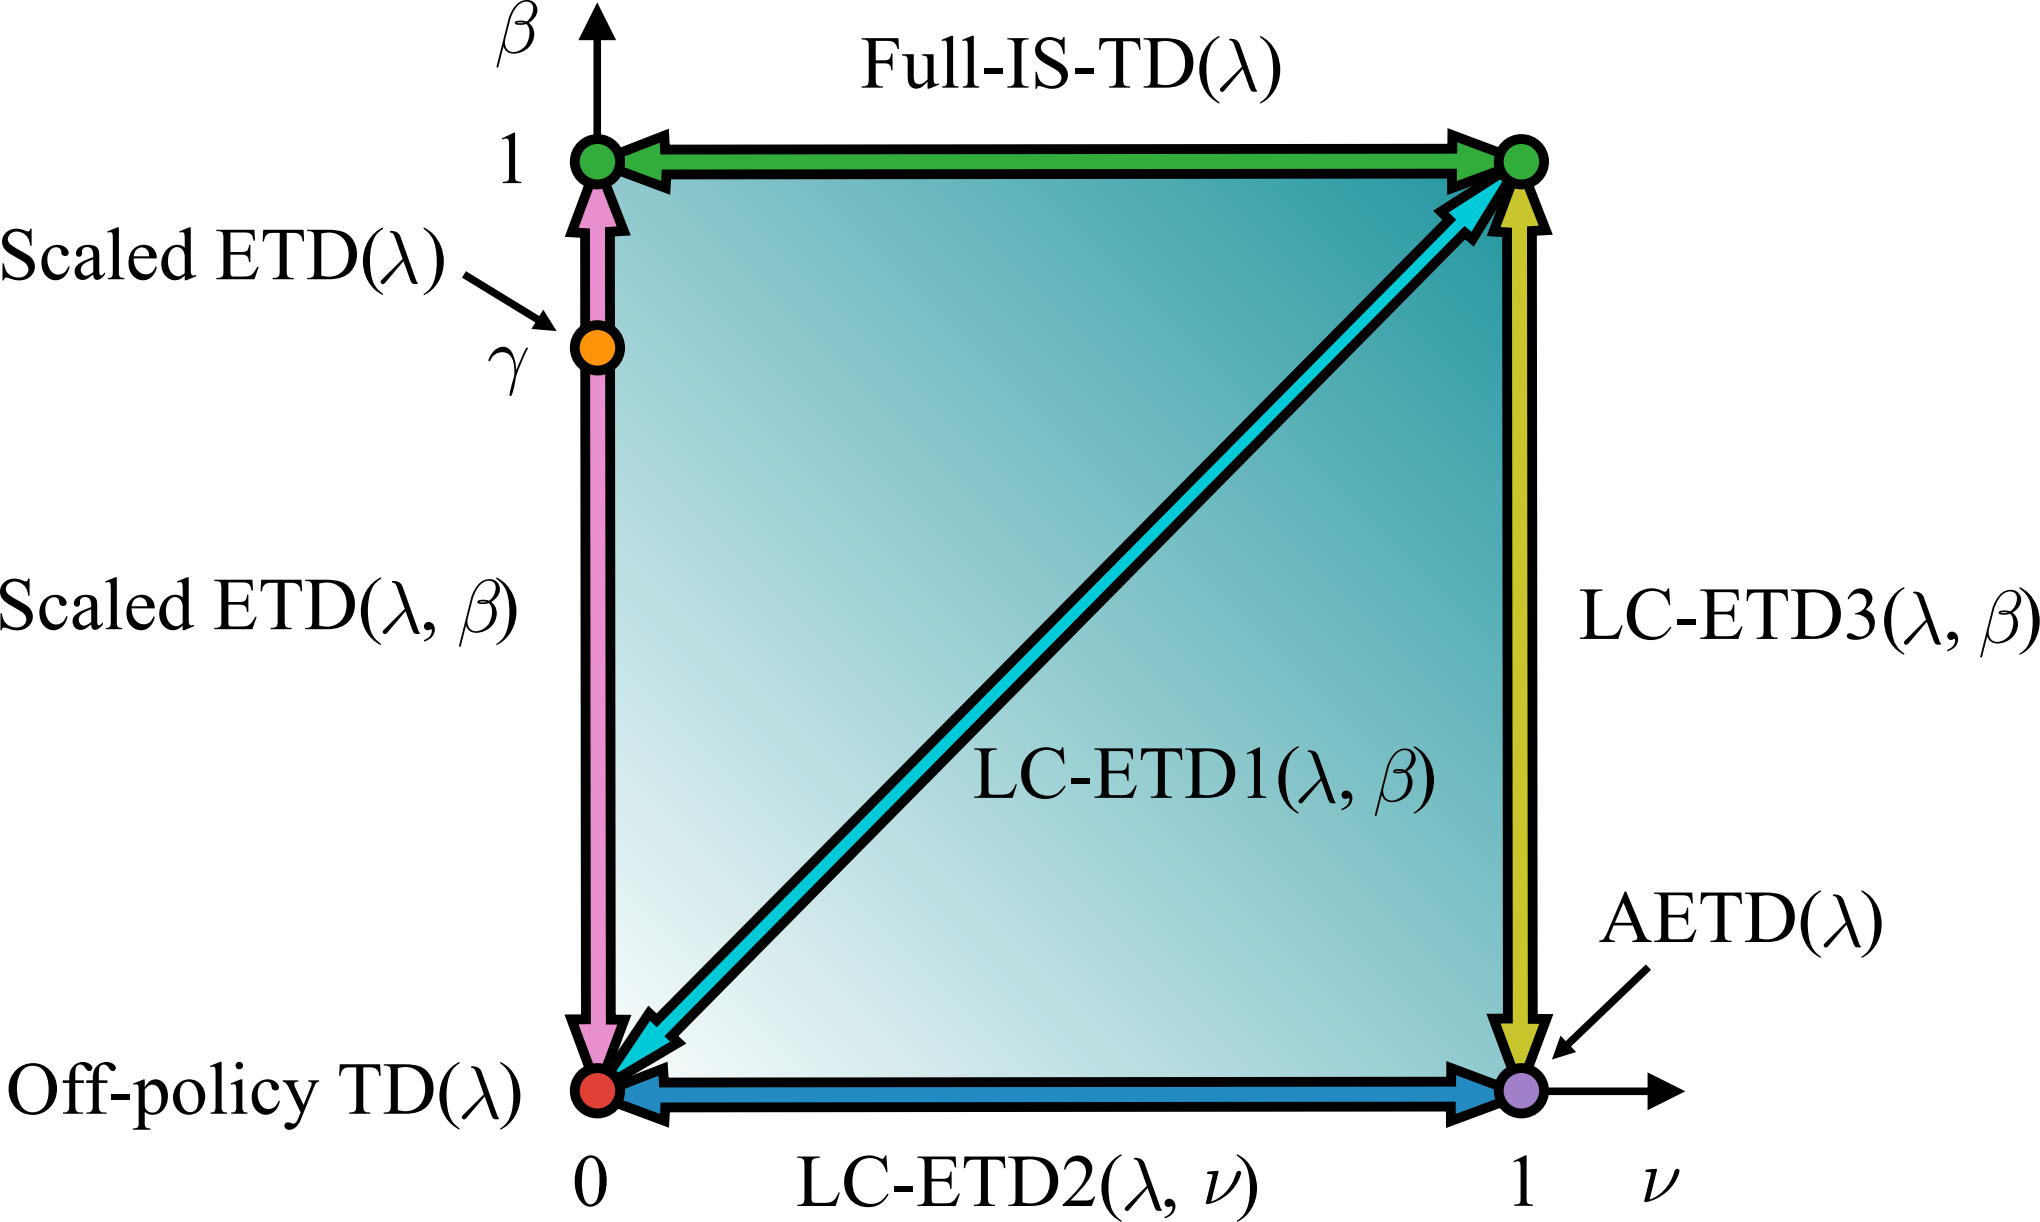

Supplement: supplementary_material [file attachment]

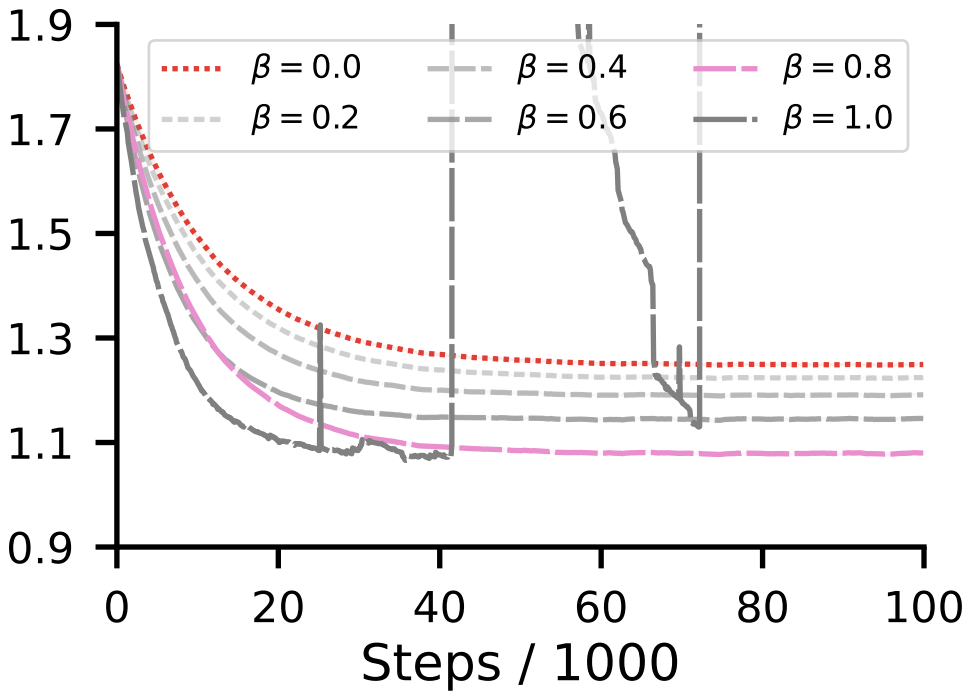

Supplement: supplementary_material [file attachment]

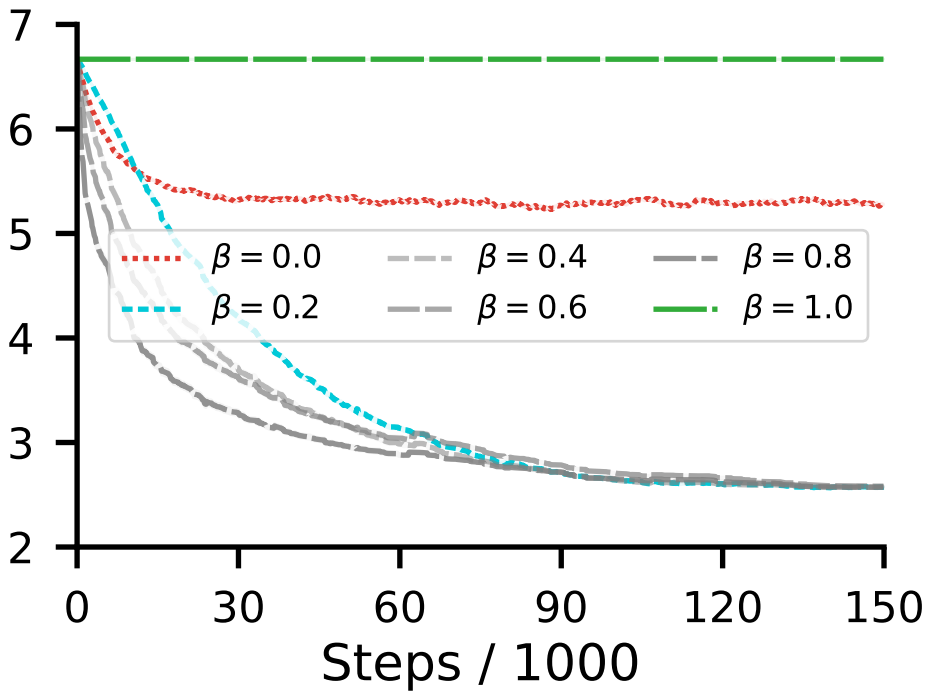

Supplement: supplementary_material [file attachment]

# LC-ETD1( $\beta$ )

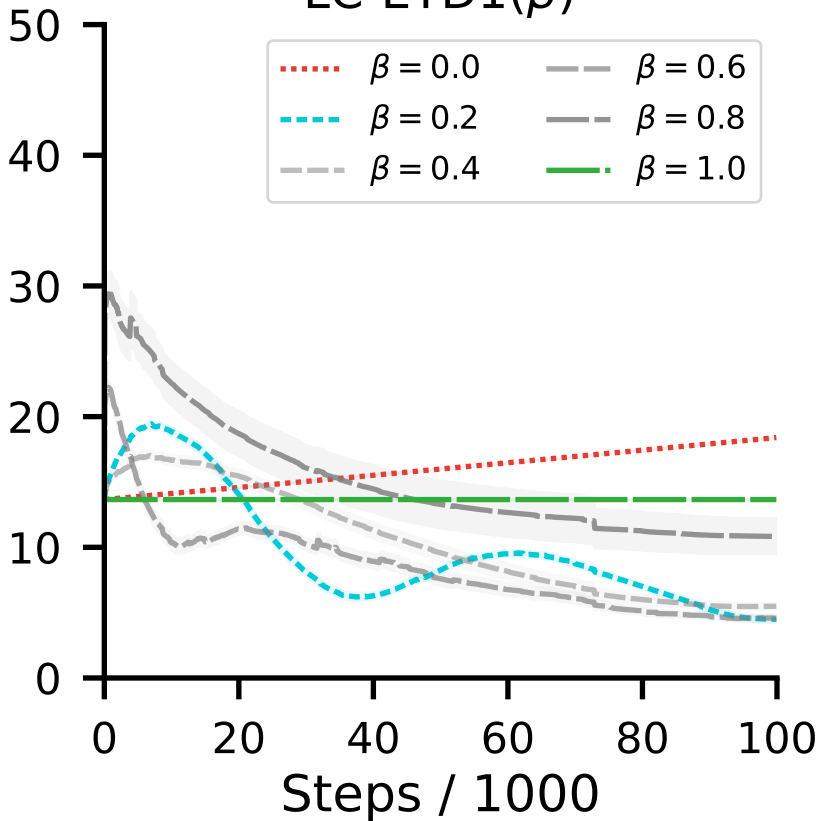

Supplement: supplementary_material [file attachment]

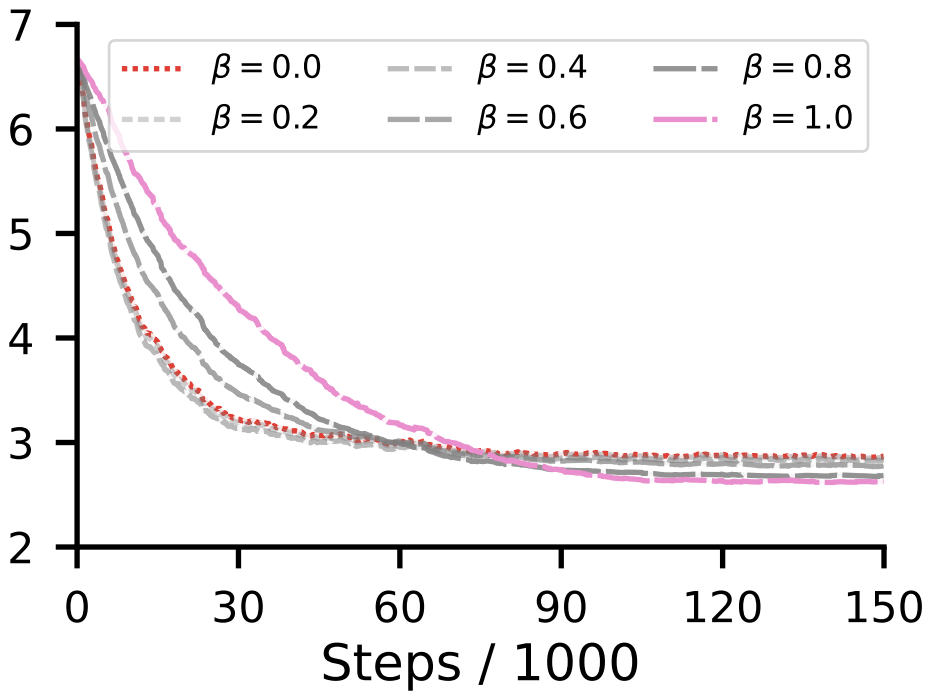

Supplement: supplementary_material [file attachment]
